# Supplementary material
Source: ML conference proceedings conference paper supplement (https://openreview.net/forum?id=rb93dP976j)
Supplement: supplementary_material [file attachment]

## Sheet: KIDPAN DATA
Back to Contents	KIDPAN_DATA	Return to MAIN DOCUMENTATION
VARIABLE NAME	DESCRIPTION	FORM	VAR START DATE	VAR END DATE	FORM SECTION	DATA TYPE	SAS ANALYSIS FORMAT	SAS SYSTEM DATA LENGTH	SAS FORMAT	VARIABLE LABEL IN SAS DATA	COMMENT
A1	CANDIDATE A1 ANTIGEN FROM WAITING LIST	WAITING LIST DATA	1987-10-01		WAITING LIST DATA	NUM	ALOCUS	8	6.	WL CANDIDATE A1 ANTIGEN
A2	CANDIDATE A2 ANTIGEN FROM WAITING LIST	WAITING LIST DATA	1987-10-01		WAITING LIST DATA	NUM	ALOCUS	8	6.	WL CANDIDATE A2 ANTIGEN
A2A2B_ELIGIBILITY	WL Blood Type B Candidate Eligibility for A2/A2B Kidneys at Removal/Current Time (0=No, 1=Yes)	WAITING LIST DATA	2014-05-27		WAITING LIST DATA	NUM		8	1.	WL Blood Type B Candidate Eligibility for A2/A2B Kidneys at Removal/Current Time
ABO	RECIPIENT BLOOD GROUP @ REGISTRATION	TCR	1987-10-01		CLINICAL INFORMATION	CHAR	ABO	3	$3.	TCR ABO BLOOD GROUP
ABO_DON	DONOR BLOOD TYPE	DDR/LDR	1987-10-01		DONOR INFORMATION	CHAR	ABO	3	$3.	DR BLOOD TYPE
ABO_MAT	DONOR-RECIPIENT ABO MATCH LEVEL	CALCULATED				CHAR	ABOMAT	1		DONOR-RECIPIENT ABO MATCH LEVEL
ACADEMIC_LEVEL_TCR	ACADEMIC ACTIVITY LEVEL AT LISTING	TCR	2004-06-30		CANDIDATE INFORMATION	NUM	ACADLVLKI	8	6.	TCR ACADEMIC ACTIVITY LEVEL
ACADEMIC_LEVEL_TRR	ACADEMIC ACTIVITY LEVEL AT TRANSPLANT	TRR	2004-06-30		PATIENT STATUS	NUM	ACADLVLKI	8	6.	TRR ACADEMIC ACTIVITY LEVEL
ACADEMIC_PRG_TCR	ACADEMIC PROGRESS AT LISTING	TCR	2004-06-30		CANDIDATE INFORMATION	NUM	ACADPRG	8	6.	TCR ACADEMIC PROGRESS
ACADEMIC_PRG_TRR	ACADEMIC PROGRESS AT TRANSPLANT	TRR	2004-06-30		PATIENT STATUS	NUM	ACADPRG	8	6.	TRR ACADEMIC PROGRESS
ACTIVATE_DATE	DATE QUALIFYING CRITERIA FIRST ENTERED	WAITING LIST DATA	1987-10-01	2014-03-20	WAITING LIST DATA	NUM		4	MMDDYY10.	WL Date Qualifying Criteria First Entered
ACUTE_REJ_EPI_KI	RECIPIENT ANY ACUTE REJECTION EPISODES BETW. TX AND DISCHARGE-KIDNEY	TRR	2004-06-30		POST TRANSPLANT CLINICAL INFORMATION	NUM	REJEPIKI	8	6.	TRR KI ACUTE REJECTION BETWEEN TX AND DISCHARGE?
ACUTE_REJ_EPI_PA	RECIPIENT ANY ACUTE REJECTION EPISODES BETW. TX AND DISCHARGE-PANCREAS	TRR	2004-06-30		POST TRANSPLANT CLINICAL INFORMATION	NUM	REJEPIKI	8	6.	TRR PA ACUTE REJECTION BETWEEN TX AND DISCHARGE?
ADMISSION_DATE	RECIPIENT DATE OF ADMISSION TO TX CENTER	TRR	1999-10-25		PATIENT STATUS	NUM		8	MMDDYY10.	TRR DATE OF ADMISSION TO TX CENTER
ADMIT_DATE_DON	DONOR ADMIT DATE	DDR	2006-04-26		DONOR INFORMATION	NUM		8	MMDDYY10.	DON ADMIT DATE
AGE	RECIPIENT AGE (YRS)	TRR-CALCULATED	1987-10-01		RECIPIENT INFORMATION	NUM		8	3.	RECIPIENT AGE
AGE_DIAB	RECIPIENT AGE OF DIABETES ONSET @ REGISTRATION-KI	TCR	1994-04-01		CLINICAL INFORMATION	NUM		8	6.	TCR Age of Diabetes Onset
AGE_DON	DONOR AGE (YRS)	DDR/LDR-CALCULATED	1987-10-01		DONOR INFORMATION	NUM		8	3.	DONOR AGE (YRS)
AGE_GROUP	RECIPIENT AGE GROUP A=ADULT P=PEDS	CALCULATED				CHAR		1
AMIS	A Locus MISMATCH LEVEL	CALCULATED				NUM		3		A Locus Mismatch Level
AMYLASE	DECEASED PANCREAS DONOR SERUM AMYLASE (PA DONORS ONLY)	DDR	1999-10-25		CLINICAL INFORMATION	NUM		8	10.2	DON SERUM AMYLASE (PA DONORS ONLY)
ANAST_LK_PA	RECIPIENT-GRAFT FAILURE CONTRIBUTORY CAUSE:ANASTOMOTIC LEAK	TRR	1994-04-01		POST TRANSPLANT CLINICAL INFORMATION	CHAR		1		GRAFT FAILURE CONTRIBUTORY CAUSE - Pancreas: ANASTOMOTIC LEAK
ANTIBODY_TESTED	CANDIDATE TESTED FOR ANTI HLA ANTIBODIES	WL	2014-03-20			CHAR		2	$2	WL Tested for Anti HLA Antibodies
ANTIHYPE_DON	DECEASED DONOR-ANTIHYPERTENSIVES W/IN 24 HRS PRE-CROSS CLAMP	DDR	1994-04-01		CLINICAL INFORMATION	CHAR		1	$1.	DDR ANTIHYPERTENSIVES PRE-CROSS CLAMP
ARGININE_DON	DECEASED DONOR-WAS DONOR GIVEN ARGININE VASOPRESSIN WITHIN 24 HRS PRE CROSS CLAMP?	DDR	2004-06-30		CLINICAL INFORMATION	CHAR		1	$1.	DDR:Arginine Vasopressin:
ART_RECON	RECIPIENT ARTERIAL RECONSTRUCTION PROCEDURE @ PA TX	TRR	1987-10-01		TRANSPLANT CLINICAL INFORMATION	NUM	ARTERIAL	8	6.	TRR Arterial Reconstruction
ART_RECON_OSTXT	RECIPIENT ARTERIAL RECONSTRUCTION PROCEDURE, SPECIFIED @ PA TX	TRR	1987-10-01		TRANSPLANT CLINICAL INFORMATION	CHAR		50	$50.	TRR Other Arterial Reconstruction
B1	CANDIDATE B1 ANTIGEN FROM WAITING LIST	WAITING LIST DATA	1987-10-01		WAITING LIST DATA	NUM	BLOCUS	8	6.	WL CANDIDATE B1 ANTIGEN
B2	CANDIDATE B2 ANTIGEN FROM WAITING LIST	WAITING LIST DATA	1987-10-01		WAITING LIST DATA	NUM	BLOCUS	8	6.	WL CANDIDATE B2 ANTIGEN
BIOP_ISLET_PA	RECIPIENT-GRAFT FAILURE CONTRIBUTORY CAUSE:BIOPSY PROVEN ISLETITS	TRR	1994-04-01		POST TRANSPLANT CLINICAL INFORMATION	CHAR		1		GRAFT FAILURE CONTRIBUTORY CAUSE- Pancreas: BIOPSY PROVEN ISLETITS
BLEED_PA	RECIPIENT-GRAFT FAILURE CONTRIBUTORY CAUSE: BLEEDING	TRR	1994-04-01		POST TRANSPLANT CLINICAL INFORMATION	CHAR		1		GRAFT FAILURE CONTRIBUTORY CAUSE - Pancreas:BLEEDING
BLOOD_INF_CONF_DON	DECEASED DONOR-INFECTION SOURE BLOOD-CONFIRMED VIA CULTURE	DDR	1994-04-01	2015-03-31	CLINICAL INFORMATION	CHAR		1	$1.	DDR INFECTION BLOOD SOURCE-CONFIRMED
BLOOD_INF_DON	DECEASED DONOR-BLOOD AS INFECTION SOURCE	DDR	1994-04-01		CLINICAL INFORMATION	NUM		8	1.	DDR INFECTION BLOOD SOURCE
BLOOD_SUGAR_DIET_PA	PANCREAS PATIENT USING DIET TO CONTROL BLOOD SUGAR	TRR/TRF	1994-04-01		CLINICAL INFORMATION	CHAR		1	$1.	TRR/TRF PANCREAS PATIENT USING DIET TO CONTROL BLOOD SUGAR
BLOOD_SUGAR_MED_RESUMED_DATE_PA	PANCREAS DATE MEDICATIONS RESUMED	TRR/TRF	2004-06-30		CLINICAL INFORMATION	NUM		8	MMDDYY10.	TRR/TRF PANCREAS DATE MEDICATIONS RESUMED
BLOOD_SUGAR_MEDICATION_PA	PANCREAS PATIENT ON ORAL MEDICATION TO CONTROL BLOOD SUGAR	TRR/TRF	1994-04-01		CLINICAL INFORMATION	CHAR		1	$1.	TRR/TRF PANCREAS PATIENT ON ORAL MEDICATION TO CONTROL BLOOD SUGAR
BMI_CALC	Calculated Recipient BMI	CALCULATED				NUM		8	8.1	Calculated Recipient BMI
BMI_DON_CALC	Donor BMI - Pre/At Donation Calculated	CALCULATED				NUM		8		Calculated Donor BMI
BMI_TCR	BMI AT LISTING	TCR	2004-06-30		CLINICAL INFORMATION AT LISTING	NUM		8	13.4	TCR BMI
BMIS	B Locus MISMATCH LEVEL	CALCULATED				NUM		3		B Locus Mismatch Level
BUN_DON	DECEASED DONOR-TERMINAL BLOOD UREA NITROGEN	DDR	1994-04-01		CLINICAL INFORMATION	NUM		8	10.2	DDR TERMINAL BLOOD UREA NITROGEN
BW4	Candidate Most Recent/at Removal BW4 Antigen From Waiting List	WAITING LIST DATA	1987-10-01		WAITING LIST DATA	NUM	WKGRPHLA	8	6.	Candidate Most Recent/at Removal BW4 Antigen From Waiting List
BW6	Candidate Most Recent/at Removal BW6 Antigen From Waiting List	WAITING LIST DATA	1987-10-01		WAITING LIST DATA	NUM	WKGRPHLA	8	6.	Candidate Most Recent/at Removal BW6 Antigen From Waiting List
C1	Candidate Most Recent/at Removal C1 Antigen From Waiting List	WAITING LIST DATA	1987-10-01		WAITING LIST DATA	NUM	CWHLA	8	6.	Candidate Most Recent/at Removal C1 Antigen From Waiting List
C2	Candidate Most Recent/at Removal C2 Antigen From Waiting List	WAITING LIST DATA	1987-10-01		WAITING LIST DATA	NUM	CWHLA	8	6.	Candidate Most Recent/at Removal C2 Antigen From Waiting List
DR51	Candidate Most Recent/at Removal DR51 Antigen From Waiting List	WAITING LIST DATA	1987-10-01		WAITING LIST DATA	NUM	DR51HLA	8	6.	Candidate Most Recent/at Removal DR51 Antigen From Waiting List
DR51_2	Candidate Most Recent/at Removal DR51 Antigen From Waiting List	WAITING LIST DATA	1987-10-01		WAITING LIST DATA	NUM	DR51HLA	8	6.	Candidate Most Recent/at Removal DR51 Antigen From Waiting List
DR52	Candidate Most Recent/at Removal DR52 Antigen From Waiting List	WAITING LIST DATA	1987-10-01		WAITING LIST DATA	NUM	DR52HLA	8	6.	Candidate Most Recent/at Removal DR52 Antigen From Waiting List
DR52_2	Candidate Most Recent/at Removal DR52 Antigen From Waiting List	WAITING LIST DATA	1987-10-01		WAITING LIST DATA	NUM	DR52HLA	8	6.	Candidate Most Recent/at Removal DR52 Antigen From Waiting List
DR53	Candidate Most Recent/at Removal DR53 Antigen From Waiting List	WAITING LIST DATA	1987-10-01		WAITING LIST DATA	NUM	DR53HLA	8	6.	Candidate Most Recent/at Removal DR53 Antigen From Waiting List
DR53_2	Candidate Most Recent/at Removal DR53 Antigen From Waiting List	WAITING LIST DATA	1987-10-01		WAITING LIST DATA	NUM	DR53HLA	8	6.	Candidate Most Recent/at Removal DR53 Antigen From Waiting List
DQ1	Candidate Most Recent/at Removal DQB1 Antigen From Waiting List	WAITING LIST DATA	1987-10-01		WAITING LIST DATA	NUM	DQHLA	8	6.	Candidate Most Recent/at Removal DQB1 Antigen From Waiting List
DQ2	Candidate Most Recent/at Removal DQB2 Antigen From Waiting List	WAITING LIST DATA	1987-10-01		WAITING LIST DATA	NUM	DQHLA	8	6.	Candidate Most Recent/at Removal DQB2 Antigen From Waiting List
C_PEPTIDE	CANDIDATE C-PEPTIDE (PANCREAS) VALUE AT REMOVAL OR MOST RECENT TIME	WAITING LIST DATA	2014-05-27		WAITING LIST DATA	NUM		8	6.2	WL C-Peptide Value
C_PEPTIDE_PA_TCR	CANDIDATE C-PEPTIDE VALUE AT LISTING (PANCREAS)	TCR	2015-03-31		CLINICAL INFORMATION	NUM		8	10.2	TCR C-Peptide Value
C_PEPTIDE_PA_TRR	C-PEPTIDE VALUE AT TRANSPLANT (PANCREAS)	TRR/TRF	2018-02-28		CLINICAL INFORMATION	NUM		8	10.2	TRR/TRF C-Peptide Value
C_PEPTIDEDATE	CANDIDATE C-PEPTIDE DATE AT REMOVAL OR MOST RECENT TIME	WAITING LIST DATA	2014-05-27		WAITING LIST DATA	NUM		8	MMDDYY10.	WL C-Peptide Date
CANCER_FREE_INT_DON	DECEASED DONOR-CANCER FREE INTERVAL (YEARS)	DDR	1994-04-01		DONOR HISTORY	NUM		8	10.1	DR CANCER FREE INTERVAL
CANCER_OTH_OSTXT_DON	DECEASED DONOR-CANCER SITE-OTHER SPECIFY	DDR	1994-04-01		DONOR HISTORY	CHAR		50	$50.	DR History of Cancer Specify//Specify:
CANCER_SITE_DON	DECEASED DONOR-CANCER SITE	DDR	1994-04-01		DONOR HISTORY	NUM	HISTCAN	8	6.	DDR CANCER SITE
CARDARREST_NEURO	DECEASED DONOR-CARDIAC ARREST POST BRAIN DEATH	DDR	1999-10-25		CLINICAL INFORMATION	CHAR		1	$1.	DON CARDIAC ARR. SINCE EVENT THAT LED TO DECL OF DEATH
CDC_RISK_HIV_DON	DECEASED DONOR - PER PHS, Does the Donor Have Risk Factors for Blood-Borne Disease Transmission?	DDR	2004-06-30		DONOR HISTORY	CHAR		1	$1.	DDR:Does the Donor meet CDC guidelines for High Risk for an organ donor:
CITIZEN_COUNTRY	CANDIDATE COUNTRY OF PERMANENT RESIDENCE @ REGISTRATION	TCR	2015-03-31		CANDIDATE INFORMATION	CHAR	$CTRY	3	$3.	TCR Country of Permanent Residence
CITIZEN_COUNTRY_DON	DECEASED DONOR-HOME COUNTRY	DDR	1999-10-25		DONOR INFORMATION	CHAR	$CTRY	3	$3.	DECEASED DONOR HOME COUNTRY
CITIZENSHIP	CANDIDATE CITIZENSHIP @ REGISTRATION	TCR	1987-10-01		CANDIDATE INFORMATION	NUM	CITIZEN	8	6.	TCR Citizenship
CITIZENSHIP_DON	DONOR CITIZENSHIP	DDR/LDR	1987-10-01		DONOR INFORMATION	NUM	CITIZDDR, CITIZEN	8	6.	DR CITIZENSHIP	DECEASED DONORS: CITIZDDR, LIVING DONORS: CITIZEN
CLIN_INFECT_DON	DECEASED DONOR-CLINICAL INFECTION (Y,N)	DDR	1994-04-01		CLINICAL INFORMATION	CHAR		1	$1.	DDR ANY CLINICAL INFECTION
CMV_DON	DONOR SEROLOGY ANTI CMV (FOR LIVING DONOR, PRE UNET DATA ONLY)	DDR/LDR	10/1/1987, 01-Oct-90		CLINICAL INFORMATION	CHAR	$SERSTAT	2	$2.	DDR ANTI - CMV SEROLOGY (P, N, U, C, ND, I)	DECEASED DONORS: 10/1/87-PRESENT; LIVING DONORS 10/1/90-10/25/99
CMV_IGG	RECIPIENT-CMV BY IGG TEST RESULT @ TRANSPLANT	TRR	1999-10-25	2015-03-31	PRETRANSPLANT CLINICAL INFORMATION	CHAR	$SERSTAT	2	$2.	TRR CMV BY IGG
CMV_IGG_DON	LIVING DONOR-CMV BY IGG TEST RESULT	LDR	1999-10-25		CLINICAL INFORMATION	CHAR	$SERSTAT	2	$2.	LDR CMV IGG (P, N, ND. U)
CMV_IGM	RECIPIENT-CMV BY IGM TEST RESULT @ TRANSPLANT	TRR	1999-10-25	2015-03-31	PRETRANSPLANT CLINICAL INFORMATION	CHAR	$SERSTAT	2	$2.	TRR CMV BY IGM
CMV_IGM_DON	LIVING DONOR-CMV BY IGM TEST RESULT	LDR	1999-10-25		CLINICAL INFORMATION	CHAR	$SERSTAT	2	$2.	LDR CMV IGM (P, N, ND. U)
CMV_NUCLEIC_DON	DONOR CMV BY NUCLEIC ACID	LDR	1994-04-01		CLINICAL INFORMATION	CHAR	$SERSTAT	2	$2.	LDR CMV NUCLEIC ACID (P,N,ND,U)
CMV_OLD_LIV_DON	LIV DONOR CMV -SEROLOGY (PRE 10/25/99 DATA)	LDR	1990-10-01	1999-10-25	CLINICAL INFORMATION	CHAR	$SERSTAT	2	$2.	LDR CMV READONLY (P,N,ND,U)
CMV_STATUS	RECIPIENT CMV Status @ TRANSPLANT	TRR	2015-03-31		CLINICAL INFORMATION	CHAR	$SERSTAT	2	$2.	TRR CMV Status
CMV_TEST_DON	LIV DONOR CMV TESTED?	LDR	1990-10-01		CLINICAL INFORMATION	CHAR		1	$1.	LDR CMV TESTED (Y,N,U)
COD_CAD_DON	DECEASED DONOR-CAUSE OF DEATH	DDR	1987-10-01		DONOR INFORMATION	NUM	DON_COD	8	6.	DECEASED DONOR CAUSE OF DEATH
COD_KI	RECIPIENT CAUSE OF DEATH	TRR/TRF	1987-10-01		PATIENT STATUS	NUM	KI_COD	8		TRR/TRF Primary Cause of Death - Kidney
COD_OSTXT_DON	DECEASED DONOR-CAUSE OF DEATH-OTHER SPECIFY	DDR	1987-10-01		DONOR INFORMATION	CHAR		50	$50.	DDR CAUSE OF DEATH OTHER TEXT
COD_OSTXT_KI	RECIPIENT CAUSE OF DEATH SPECIFIED@ FOLLOW-UP-KI	TRF	1987-10-01		PATIENT STATUS AT TIME OF FOLLOW-UP	CHAR		50		TRR/TRF Primary Cause of Death TEXT - Kidney
COD_OSTXT_PA	RECIPIENT CAUSE OF DEATH SPECIFIED@ FOLLOW-UP-PA	TRF	1987-10-01		PATIENT STATUS AT TIME OF FOLLOW-UP	CHAR		50		TRR/TRF Primary Cause of Death TEXT - Pancreas
COD_OSTXT_WL	WL CANDIDATE CAUSE OF DEATH FOR DEATH REMOVAL, OTHER SPECIFIED	TCR	2003-12-03			CHAR		50	$50.	WL CANDIDATE CAUSE OF DEATH FOR DEATH REMOVAL, OTHER SPECIFIED
COD_PA	RECIPIENT CAUSE OF DEATH	TRR/TRF	1987-10-01		PATIENT STATUS	NUM	PA_COD	8		TRR/TRF Primary Cause of Death - Pancreas
COD_WL	CANDIDATE CAUSE OF DEATH FOR DEATH REMOVAL	WAITING LIST DATA	2003-12-03			NUM	TH_COD	8	11.	WL CANDIDATE CAUSE OF DEATH FOR DEATH REMOVAL
COD2_KI	RECIPIENT CONTRIBUTORY CAUSE OF DEATH 1	TRF/TRR	2004-06-30		PATIENT STATUS	NUM	KI_COD	8		TRR/TRF CONTRIBUTARY CAUSE OF DEATH - Kidney:1
COD2_OSTXT_KI	RECIPIENT CONTRIBUTARY CAUSE OF DEATH 1- OTHER SPECIFY	TRF/TRR	2004-06-30		PATIENT STATUS	CHAR		50	$50.	TRR/TRF CONTRIBUTARY CAUSE OF DEATH - Kidney:1 TEXT
COD2_OSTXT_PA	RECIPIENT CONTRIBUTARY CAUSE OF DEATH 1- OTHER SPECIFY	TRF/TRR	2004-06-30		PATIENT STATUS	CHAR		50	$50.	TRR/TRF CONTRIBUTARY CAUSE OF DEATH - Pancreas:1 TEXT
COD2_PA	RECIPIENT CONTRIBUTORY CAUSE OF DEATH 1	TRF/TRR	2004-06-30		PATIENT STATUS	NUM	PA_COD	8		TRR/TRF CONTRIBUTARY CAUSE OF DEATH - Pancreas:1
COD3_KI	RECIPIENT CONTRIBUTORY CAUSE OF DEATH 2	TRF/TRR	2004-06-30		PATIENT STATUS	NUM	KI_COD	8		TRR/TRF CONTRIBUTARY CAUSE OF DEATH - Kidney:2
COD3_OSTXT_KI	RECIPIENT CONTRIBUTARY CAUSE OF DEATH 2- OTHER SPECIFY	TRF/TRR	2004-06-30		PATIENT STATUS	CHAR		50	$50.	TRR/TRF CONTRIBUTARY CAUSE OF DEATH - Kidney:2 TEXT
COD3_OSTXT_PA	RECIPIENT CONTRIBUTARY CAUSE OF DEATH 2- OTHER SPECIFY	TRF/TRR	2004-06-30		PATIENT STATUS	CHAR		50	$50.	TRR/TRF CONTRIBUTARY CAUSE OF DEATH - Pancreas:2 TEXT
COD3_PA	RECIPIENT CONTRIBUTORY CAUSE OF DEATH 2	TRF/TRR	2004-06-30		PATIENT STATUS	NUM	PA_COD	8		TRR/TRF CONTRIBUTARY CAUSE OF DEATH- Pancreas:2
COLD_ISCH_KI	KIDNEY COLD ISCHEMIC TIME (HOURS)	TRR	1994-04-01		TRANSPLANT CLINICAL INFORMATION	NUM		8	10.2	COLD ISCHEMIC TIME (HOURS)
COMPL_ABSC	RECIPIENT-PANCREAS TRANSPLANT COMPLICATION-ABCESS/LOCAL INFECTION	TRR	1994-04-01		POST TRANSPLANT CLINICAL INFORMATION	CHAR		1	$1.	TRR ABCESS OR LOCAL INFECITON
COMPL_ANASLK	RECIPIENT-PANCREAS TRANSPLANT COMPLICATION-ANASTOMOTIC LEAK	TRR	1994-04-01		POST TRANSPLANT CLINICAL INFORMATION	CHAR		1	$1.	TRR ANASTOMOTIC LEAK
COMPL_PANCREA	RECIPIENT-PANCREAS TRANSPLANT COMPLICATION-PANCREATITIS	TRR	1994-04-01		POST TRANSPLANT CLINICAL INFORMATION	CHAR		1	$1.	TRR PANCREATIS
COMPOSITE_DEATH_DATE	Composite Patient Death Date from OPTN or Verified from External Sources	TRR/TRF-CALCULATED				NUM		8	MMDDYY10.	Composite Patient Death Date from OPTN or Verified from External Sources
CONTIN_ALCOHOL_OLD_DON	DECEASED DONOR-HISTORY OF ALCOHOL DEPENDENCY+ RECENT 6MO USE	DDR	1994-04-01	2004-06-29	DONOR HISTORY	CHAR		1	$1.	ARCHIVED DDR CONTIN ALCOHOL (Y, N, U)
CONTIN_CIG_DON	DECEASED DONOR-HISTORY OF CIGARETTES IN PAST@ >20PACK YRS+RECENT 6MO USE	DDR	1994-04-01		DONOR HISTORY	CHAR		1	$1.	DDR CONTINUED CIGARETTE USE
CONTIN_COCAINE_DON	DECEASED DONOR-HISTORY OF COCAINE USE+RECENT 6MO USE	DDR	1999-10-25		DONOR HISTORY	CHAR		1	$1.	DDR COCAINE USE IN LAST 6 MONTHS (Y/N)
CONTIN_IV_DRUG_OLD_DON	DECEASED DONOR-HISTORY OF IV DRUG USE+RECENT 6MO USE	DDR	1994-04-01	2004-06-29	DONOR HISTORY	CHAR		1	$1.	ARCHIVED DDR CONTIN IV DRUG USE (Y, N, U)
CONTIN_OTH_DRUG_DON	DECEASED DONOR-HISTORY OF OTHER DRUGS IN PAST+RECENT 6MO USE	DDR	1994-04-01		DONOR HISTORY	CHAR		1	$1.	DDR CONTINUED OTHER DRUG USE
CONTROLLED_DON	DECEASED DONOR CONTROLLED NON-HEART BEATING (Y/N)	DDR	1994-04-01		ORGAN RECOVERY	CHAR		1	$1.	DDR CONTROLLED NON-HEART BEATING (Y/N)
CORE_COOL_DON	DECEASED DONOR-CORE COOLING FOR CONTROLLED NON-HRT BEATING	DDR	1994-04-01		ORGAN RECOVERY	CHAR		1	$1.	DDR CORE COOLING USED
CREAT_CLEAR	CANDIDATE MEASURED CREATININE CLEARANCE (ML/MIN)	WAITING LIST DATA			WAITING LIST DATA	NUM		8	9.4	WL CREATININE CLEARANCE
CREAT_CLEAR_DATE	DATE CREATININE CLEARANCE BECAME <=20 ML/MIN	WAITING LIST DATA			WAITING LIST DATA	NUM		4	MMDDYY10.	WL DATE OF CREATININE CLEARANCE
CREAT_DON	DECEASED DONOR-TERMINAL LAB CREATININE	DDR	1994-04-01		CLINICAL INFORMATION	NUM		8	10.2	DDR TERMINAL LAB CREATININE
CREAT_TRR	RECIPIENT SERUM CREATININE AT TIME OF TX	TRR	1994-04-01		PRETRANSPLANT CLINICAL INFORMATION	NUM		8	10.2	Serum Creatinine at Time of Transplant
CTR_CODE	ENCRYPTED TRANSPLANT CENTER CODE	CALCULATED				CHAR		8
CURRENT_PRA	CANDIDATE MOST RECENT "CURRENT" PRA FROM WAITING LIST/ALLOCATION	WAITING LIST DATA	1987-10-01		WAITING LIST DATA	NUM		8	6.	WL Candidate Most Recent Current PRA	PRA was used in allocation prior to 10/1/2009
DA1	DONOR A1 ANTIGEN	CALCULATED	1987-10-01		DONOR CENTER HISTOCOMPATIBILITY TYPING	NUM	ALOCUS	8	6.	Computed Donor A1 Antigen
DA2	DONOR A2 ANTIGEN	CALCULATED	1987-10-01		DONOR CENTER HISTOCOMPATIBILITY TYPING	NUM	ALOCUS	8	6.	Computed Donor A2 Antigen
DATA_TRANSPLANT	Recipient TRR Data Reported	CALCULATED				CHAR		1	$1.	RECIPIENT TRR DATA REPORTED
DATA_WAITLIST	Candidate WL Data Reported	CALCULATED				CHAR		1	$1.	CANDIDATE WL DATA REPORTED
DAYSWAIT_ALLOC	TIME USED FOR ALLOCATION PRIORITY (DAYS)	CALCULATED	1987-10-01			NUM		8		Time Used for Allocation Priority (days)
DAYSWAIT_CHRON	TOTAL DAYS ON WAITING LIST INCLUDING INACTIVE TIME	CALCULATED	1987-10-01			NUM		8	5.	TOTAL DAYS ON WAITING LIST/INCLUDING INACTIVE TIME
DAYSWAIT_CHRON_KI	TOTAL DAYS ON KIDNEY WAITING LIST	CALCULATED				NUM		8		Days on Waiting List
DAYSWAIT_CHRON_PA	TOTAL DAYS ON PANCREAS WAITING LIST	CALCULATED				NUM		8		Days on Waiting List
DB1	DONOR B1 ANTIGEN	CALCULATED	1987-10-01		DONOR CENTER HISTOCOMPATIBILITY TYPING	NUM	BLOCUS	8	6.	Computed Donor B1 Antigen
DB2	DONOR B2 ANTIGEN	CALCULATED	1987-10-01		DONOR CENTER HISTOCOMPATIBILITY TYPING	NUM	BLOCUS	8	6.	Computed Donor B2 Antigen
DDAVP_DON	DECEASED DONOR-SYNTHETIC ANTI DIURETIC HORMONE (DDAVP)	DDR	1999-10-25		CLINICAL INFORMATION	CHAR		1	$1.	DDR DONOR GIVEN SYNTHETIC ANTI DIURETIC HORMONE (DDAVP)
DDR1	DONOR DR1 ANTIGEN	CALCULATED	1987-10-01		DONOR CENTER HISTOCOMPATIBILITY TYPING	NUM	DRLOCUS	8	6.	Computed Donor DR1 Antigen
DDR2	DONOR DR2 ANTIGEN	CALCULATED	1987-10-01		DONOR CENTER HISTOCOMPATIBILITY TYPING	NUM	DRLOCUS	8	6.	Computed Donor DR2 Antigen
DEATH_CIRCUM_DON	DECEASED DONOR-CIRCUMSTANCE OF DEATH	DDR	1994-04-01		DONOR INFORMATION	NUM	DTHCIRC	8	6.	DDR CIRCUMSTANCE OF DEATH
DEATH_DATE	DATE DIED, FOR PATIENT REMOVED FROM THE WAITING LIST FOR REASON OF DEATH	WAITING LIST DATA	1999-10-25		WAITING LIST DATA	NUM		8	MMDDYY10.	WL DATE OF DEATH/POST 10/25/99 REMOVALS
DEATH_MECH_DON	DECEASED DONOR-MECHANISM OF DEATH	DDR	1994-04-01		DONOR INFORMATION	NUM	DTHMECH	8	6.	DDR MECHANISM OF DEATH
DGN_OSTXT_TCR	PRIMARY DIAGNOSIS OTHER,SPECIFY TEXT AT TIME OF LISTING	TCR	1994-04-01		CLINICAL INFORMATION	CHAR		50	$50.	TCR Primary Diagnosis/Text of other, Specify	ONLY COLLECTED SINCE 4/1/94
DGN_TCR	PRIMARY DIAGNOSIS AT TIME OF LISTING	TCR	1994-04-01		CLINICAL INFORMATION	NUM	KI_DGN, PA_DGN	8	6.	TCR Primary Diagnosis at Listing	ONLY COLLECTED SINCE 4/1/94
DGN2_OSTXT_TCR	PRIMARY PANCREAS DIAGNOSIS (FOR KP ONLY) OTHER,SPECIFY TEXT AT TIME OF LISTING	TCR	1994-04-01		CLINICAL INFORMATION	CHAR		50	$50.	TCR Primary Pancreas Diagnosis/Text of Other, Specify at Listing for KP Registration	ONLY COLLECTED SINCE 4/1/94
DGN2_TCR	PRIMARY PANCREAS DIAGNOSIS (FOR KP ONLY) AT TIME OF LISTING	TCR	1994-04-01		CLINICAL INFORMATION	NUM	PA_DGN	8	6.	TCR Primary Pancreas Diagnosis at Listing for KP Registration	ONLY COLLECTED SINCE 4/1/94
DIAB	RECIPIENT DIABETES @ REGISTRATION	TCR	1994-04-01		CLINICAL INFORMATION	NUM	DIABTY	8	6.	TCR DIABETES
DIABDUR_DON	DECEASED DONOR-DIABETES DURATION	DDR	1994-04-01		DONOR HISTORY	NUM	HISTDIAB	8		DDR DIABETES DURATION	UNROLLED FROM HIST_DIABETES_DON TO INCLUDE DURATION ONLY
DIABETES_DON	DECEASED DONOR-HISTORY OF DIABETES (Y=Yes,N=No)	DDR	1994-04-01		DONOR HISTORY	CHAR		1		DDR DIABETES (Y,N)	UNROLLED Y/N FIELD FROM HIST_DIABETES_DON
DIAG_KI	KIDNEY RECIPIENT PRIMARY DIAGNOSIS @ TX	TRR>TCR	1987-10-01		PATIENT STATUS/CLINICAL INFORMATION	NUM	KI_DGN	8		Kidney Diagnosis from TRR/TCR
DIAG_OSTXT_KI	KIDNEY RECIPIENT PRIMARY DIAGNOSIS SPECIFIED	TRR>TCR	1987-10-01		PATIENT STATUS/CLINICAL INFORMATION	CHAR		50		Kidney Diagnosis Text from TRR/TCR
DIAG_OSTXT_PA	PANCREAS RECIPIENT PRIMARY DIAGNOSIS SPECIFIED	TRR>TCR	1987-10-01		PATIENT STATUS/CLINICAL INFORMATION	CHAR		50		Pancreas Diagnosis Text from TRR/TCR
DIAG_PA	PANCREAS RECIPIENT PRIMARY DIAGNOSIS @ TX	TRR>TCR	1987-10-01		PATIENT STATUS/CINICAL INFORMATION	NUM	PA_DGN	8		DIAGNOSIS FROM DISCHARGE/TRR/TCR
DIAL_DATE	RECIPIENT DATE FIRST DIALYZED @ TRANSPLANT	TRR	1999-10-25		PRETRANSPLANT CLINICAL INFORMATION	NUM		8	MMDDYY10.	TRR DATE FIRST DIALYZED
DIAL_TRR	RECIPIENT PRETRANSPLANT DIALYSIS (Y,N) @ TRANSPLANT	TRR	1990-10-01		PRETRANSPLANT CLINICAL INFORMATION	CHAR		1		TRR DIALYSIS (Y,N)
DIALYSIS_DATE	WL Date of Initiation of Regularly Administered Dialysis for ESRD	WAITING LIST DATA			WAITING LIST DATA	NUM		8	MMDDYY10.	WL DATE BEGAN DIALYSIS
DIET_DON	DECEASED DONOR-HYPERTENSION DIET CONTROLLED	DDR	1994-04-01		DONOR HISTORY	CHAR		1	$1.	DR: History of HYPERTENSION Diet//Diet
DISCHARGE_DATE	RECIPIENT DISCHARGE DATE FROM TX CENTER	TRR	1994-04-01		PATIENT STATUS	NUM		8	MMDDYY10.	TRR DATE OF DISCHARGE FROM TX CENTER
DISTANCE	DISTANCE FROM DONOR HOSP TO TX CENTER (Nautical Miles)	CALCULATED				NUM		8		DISTANCE FROM DONOR HOSP TO TX CENTER (Nautical Miles)
DIURETICS_DON	DECEASED DONOR-HYPERTENSION DIURETIC CONTROLLED	DDR	1994-04-01		DONOR HISTORY	CHAR		1	$1.	DR History of HYPERTENSION DIURECTICS??DIURECTICS:
DOBUT_DON_OLD	DECEASED DONOR-DOBUTAMINE W/IN 24 HRS PRE-CROSS CLAMP	DDR	1994-04-01	2003-01-27	CLINICAL INFORMATION	CHAR		1	$1.	ARCHIVED DDR DOBUTAMINE PRIOR TO CROSS CLAMP
DON_RETYP	DECEASED DONOR-RETYPED AT TX CENTER	RH	1987-10-01		TEST INFORMATION	CHAR		1	$1.	RH DONOR RETYPED AT YOUR CENTER
DON_TY	DONOR TYPE - DECEASED OR LIVING	TRR	1994-04-01		DONOR INFORMATION	CHAR	$DON_TYP	3	$3.	DONOR TYPE - DECEASED, LIVING OR FOREIGN
DONATION	WL Will Receive Donation Points due to a Previous Living Organ Donation	WAITING LIST DATA	1996-04-01		WAITING LIST DATA	CHAR		1	$1.	WL Will Receive Donation Points due to a Previous Living Organ Donation
DONATION_DON	LIVING DONOR-DONATION AS SECONDARY PAYMENT TYPE	LDR	1999-10-25		DONOR INFORMATION	CHAR		1	$1.	LDR DONATION SECONDARY SOURCE OF PAYMENT
DONOR_ID	ENCRYPTED DONOR IDENTIFIER	CALCULATED				NUM		8		ENCRYPTED DONOR IDENTIFIER
DOPAMINE_DON_OLD	DECEASED DONOR-DOPAMINE W/IN 24 HRS PRE-CROSS CLAMP	DDR	1994-04-01	2003-01-27	CLINICAL INFORMATION	CHAR		1	$1.	ARCHIVED DDR DOPAMINE PRIOR TO CROSS CLAMP
DR1	CANDIDATE DR1 ANTIGEN FROM WAITING LIST	WAITING LIST DATA	1987-10-01		WAITING LIST DATA	NUM	DRLOCUS	8	6.	WL CANDIDATE DR1 ANTIGEN
DR2	CANDIDATE DR2 ANTIGEN FROM WAITING LIST	WAITING LIST DATA	1987-10-01		WAITING LIST DATA	NUM	DRLOCUS	8	6.	WL CANDIDATE DR2 ANTIGEN
DRMIS	DR Locus MISMATCH LEVEL	CALCULATED				NUM		3		DR Locus Mismatch Level
DRUGTRT_COPD	RECIPIENT DRUG TREATED COPD @ REGISTRATION	TCR	1994-04-01	2015-03-31	CLINICAL INFORMATION	CHAR		1	$1.	TCR Drug Treated COPD: pre 3/31/2015 for KI & KP
DUCT_MGMT	RECIPIENT DUCT MANAGEMENT PROCEDURE @ PA TX	TRR	1987-10-01		TRANSPLANT CLINICAL INFORMATION	NUM	PADUCTMG	8	6.	TRR DUCT MANAGEMENT
DUCT_MGMT_OSTXT	RECIPIENT DUCT MANAGEMENT PROCEDURE SPECIFIED @ PA TX	TRR	1987-10-01		TRANSPLANT CLINICAL INFORMATION	CHAR		50	$50.	TRR DUCT MANAGEMENT TEXT
DWFG_KI	RECIPIENT DIED W/FUNCTIONING GRAFT	CALCULATED				CHAR		1		Recipient Died with Functioning Graft
EBV_DNA_DON	LIVING DONOR-EPSTEIN BARR VIRUS BY DNA TEST RESULT	LDR	1999-10-25		CLINICAL INFORMATION	CHAR	$SERSTAT	2	$2.	LDR EBV DNA (P,N,ND,U)
EBV_IGG_CAD_DON	DECEASED DONOR EPSTEIN BARR VIRUS BY IGG TEST RESULT	DDR	2006-05-03		CLINICAL INFORMATION	CHAR	$SERSTAT	2	$2.	DDR: EBV//IGG
EBV_IGG_DON	LIVING DONOR EPSTEIN BARR VIRUS BY IGG TEST RESULT	LDR	1999-10-25		CLINICAL INFORMATION	CHAR	$SERSTAT	2	$2.	LDR EBV IGG (P,N,ND,U)
EBV_IGM_CAD_DON	DECEASED DONOR EPSTEIN BARR VIRUS BY IGM TEST RESULT	DDR	2006-05-03		CLINICAL INFORMATION	CHAR	$SERSTAT	2	$2.	DDR: EBV//IGM
EBV_IGM_DON	LIVING DONOR EPSTEIN BARR VIRUS BY IGM TEST RESULT	LDR	1999-10-25		CLINICAL INFORMATION	CHAR	$SERSTAT	2	$2.	LDR EBV IGM (P,N,ND,U)
EBV_SEROSTATUS	RECIPIENT EPSTEIN BARR VIRUS STATUS AT TRANSPLANT-ADULTS ONLY	CALCULATED				CHAR	$SERSTAT	2	$2.	EBV_SEROSTATUS
EBV_TEST_DON	LIVING DONOR EPSTEIN BARR VIRUS TESTED?	LDR	1994-04-01		CLINICAL INFORMATION - SEROLOGY	CHAR		1	1.	LDR EBV TESTED (Y,N,U)
ECD_DONOR	ECD DONOR	CALCULATED				NUM		8		EXPANDED DONOR (PER KIDNEY ALLOCATION DEFINITION)
EDUCATION	RECIPIENT HIGHEST EDUCATIONAL LEVEL @ REGISTRATION	TCR	1994-04-01		CANDIDATE INFORMATION	NUM	EDLEVEL	8	6.	TCR HIGHEST EDUCATIONAL LEVEL
EDUCATION_DON	LIVING DONOR-HIGHEST LEVEL OF EDUCATION	LDR	1999-10-25		DONOR INFORMATION	NUM	EDLEVEL	8	6.	DON HIGHEST EDUCATION LEVEL
END_BMI_CALC	CALCULATED CANDIDATE BMI AT REMOVAL/CURRENT TIME	CALCULATED				NUM		8	8.1	Calculated Candidate BMI at Removal/Current Time
END_CPRA	CANDIDATE MOST RECENT CALCULATED PRA	CALCULATED	2007-12-05			NUM		8		CANDIDATE MOST RECENT CALCULATED PRA	PRA was used in allocation prior to 10/1/2009
END_CPRA_DETAIL	CANDIDATE DETAILED VALUE OF MOST RECENT CALCULATED PRA (CPRA is used in allocation since 10/1/2009 )	CALCULATED	2007-12-05			NUM		8		CANDIDATE DETAILED VALUE OF MOST RECENT CALCULATED PRA	CPRA is used in allocation since to 10/1/2009
END_DATE	EARLIEST OF DATES OF REMOVAL FROM WAITING LIST, TRANSPLANT, DEATH, OR TIME COPY OF DATA CREATED	WAITING LIST DATA	1987-10-01		WAITING LIST DATA	NUM		8	MMDDYY10.	WL DATE OF REMOVAL/TRANSPLANT/DEATH/ OR ANALYSIS (IF STILL WAITING)	IF PATIENT TRANSPLANTED OR DIED, BUT WAS REMOVED AFTER THE EVENT, END_DATE IS BACKDATED TO GIVE THE DATE OF EVENT
END_EPTS	Offer/Removal/Current Calculated EPTS (since 5/27/2014)	WAITING LIST DATA	2014-05-27		WAITING LIST DATA	NUM		8	5.2	Offer/Removal/Current Calculated EPTS (since 5/27/2014)
END_OPO_CTR_CODE	ENCRYPTED REMOVAL/CURRENT OPO MAPPED FROM LISTING CENTER AND ENDING DATE	CALCULATED				CHAR		12	$8.
END_STAT	CANDIDATE STATUS AT TRANSPLANT OFFER/REMOVALCURRENT TIME	TRR>TCR	1990-10-01		WAITING LIST DATA	NUM	STAT	8	6.	WL MOST RECENT WAITING LIST STATUS
END_STAT_KI	KIDNEY STATUS AT TIME OF TRANSPLANT	WAITING LIST DATA	1990-10-01		WAITING LIST DATA	NUM	STAT	8	6.	Status at Transplant
END_STAT_PA	PANCREAS STATUS AT TIME OF TRANSPLANT	WAITING LIST DATA	1990-10-01		WAITING LIST DATA	NUM	STAT	8	6.	Status at Transplant
ENTERIC_DRAIN	RECIPIENT CONVERSION FROM BLADDER TO ENTERIC DRAINAGE @ PA-FOLLOW-UP	TRF	1994-04-01		CLINICAL INFORMATION	CHAR		1	$1.	TRF ENTERIC DRAIN
ENTERIC_DRAIN_DT	RECIPIENT CONVERSION TO ENTERIC DRAINAGE DATE @PA-FOLLOW-UP	TRF	1994-04-01		CLINICAL INFORMATION	NUM		8	MMDDYY10.	TRF ENTERIC DRAIN DATE
ETHCAT	RECIPIENT ETHNICITY CATEGORY	TCR-CALCULATED			CANDIDATE INFORMATION	NUM	ETHCAT	8		ETHNICITY CATEGORY	Beginning on 11/04/2001 we started allowing the collection of multiple races.
ETHCAT_DON	DONOR ETHNICITY CATEGORY	DDR/LDR-CALCULATED			DONOR INFORMATION	NUM	ETHCAT	8		DONOR ETHNICITY CATEGORY	Beginning on 11/04/2001 we started allowing the collection of multiple races.
ETHNICITY	RECIPIENT ETHNICITY	TCR	1994-04-01		CANDIDATE INFORMATION	NUM	ETHN	8		ETHNICITY: 1=Hispanic 0=Non-Hispanic
EXH_PERIT_ACCESS	RECIPIENT EXHAUSTED VASCULAR ACCESS @ REGISTRATION	TCR	1999-10-25		CLINICAL INFORMATION	CHAR		1	$1.	TCR EXHAUSTED PERITONEAL ACCESS AT LISTING
EXH_VASC_ACCESS	RECIPIENT EXHAUSTED PERITONEAL ACCESS @ REGISTRATION	TCR	1999-10-25		CLINICAL INFORMATION	CHAR		1	$1.	TCR EXHAUSTED VASCULAR ACCESS AT LISTING
EXTRACRANIAL_CANCER_DON	DECEASED DONOR-EXTRACANIAL CANCER AT PROCUREMENT	DDR	1994-04-01		DONOR HISTORY	CHAR		1	$1.	DDR EXTRACANIAL CANCER AT PROCUREMENT
FAILDATE_KI	GRAFT FAIL DATE-KIDNEY	TRR/TRF-CALCULATED	1987-10-01		POST TRANSPLANT CLINICAL INFORMATION	NUM		8	MMDDYY10.	Date of Graft Failure
FAILDATE_PA	GRAFT FAIL DATE-PANCREAS	TRR/TRF-CALCULATED	1987-10-01		POST TRANSPLANT CLINICAL INFORMATION	NUM		8	MMDDYY10.	GRAFT FAIL DATE
FIN_RESIST_TX	FINAL RESTSITANCE AT TRANSPLANT	TRR	2004-06-30	2015-03-31	TRANSPLANT CLINICAL INFORMATION	NUM		8	20.2	FINAL RESISTANCE AT TRANSPLANT
FIRST_WK_DIAL	RECIPIENT DIALYSIS W/IN FIRST WEEK OF KIDNEY TX	TRR	1987-10-01		POST TRANSPLANT CLINICAL INFORMATION	CHAR		1	$1.	TRR Dialysis in First Week
FREE_DON	LIVING DONOR-FREE CARE AS SECONDARY PAYMENT TYPE	LDR	1999-10-25		DONOR INFORMATION	CHAR		1	$1.	LDR FREE CARE SECONDARY SOURCE OF PAYMENT
FUNC_STAT_TCR	RECIPIENT FUNCTIONAL STATUS @ REGISTRATION	TCR	1994-04-01		CANDIDATE INFORMATION	NUM	FUNCSTAT	8	6.	TCR FUNCTIONAL STATUS @LISTING
FUNC_STAT_TRF	TRF FUNCTIONAL STATUS @ TRR/FOL	TRR/TRF	1997-04-01		PATIENT STATUS AT TIME OF FOLLOW-UP	NUM	FUNCSTAT	8		Most Recent FUNCTIONAL STATUS
FUNC_STAT_TRR	RECIPIENT FUNCTIONAL STATUS @TRANSPLANT	TRR	1994-04-01		PATIENT STATUS	NUM	FUNCSTAT	8	6.	TRR FUNCTIONAL STATUS @TRANSPLANT
GENDER	RECIPIENT GENDER	TCR	1987-10-01		CANDIDATE INFORMATION	CHAR	$SEX	1	$1.	TCR RECIPIENT GENDER
GENDER_DON	DONOR GENDER	DDR/LDR	1987-10-01		DONOR INFORMATION	CHAR	$SEX	1	$1.	DONOR GENDER
GFR	CANDIDATE GFR SCORE	WAITING LIST DATA			WAITING LIST DATA	NUM		8	9.4	WL GFR SCORE
GFR_DATE	DATE GFR BECAME <=20 MIL/MIN	WAITING LIST DATA			WAITING LIST DATA	NUM		4	MMDDYY10.	WL GFR DATE
GRF_FAIL_CAUSE_OSTXT_KI	RECIPIENT GRAFT FAILURE PRIMARY CAUSE SPECIFIED-KI	TRR/TRF	1987-10-01		POST TRANSPLANT CLINICAL INFORMATION	CHAR		50		Cause of Graft Failure TEXT
GRF_FAIL_CAUSE_OSTXT_PA	RECIPIENT GRAFT FAILURE PRIMARY CAUSE SPECIFIED-PA	TRR/TRF	1987-10-01		POST TRANSPLANT CLINICAL INFORMATION	CHAR		50		Cause of Graft Failure TEXT
GRF_FAIL_CAUSE_TY_KI	RECIPIENT GRAFT FAILURE PRIMARY CAUSE-KI	TRR/TRF	1987-10-01		POST TRANSPLANT CLINICAL INFORMATION	NUM	GRFAILKI	8		Cause of Graft Failure
GRF_FAIL_CAUSE_TY_PA	RECIPIENT GRAFT FAILURE PRIMARY CAUSE-PA	TRR/TRF	1987-10-01		POST TRANSPLANT CLINICAL INFORMATION	NUM	GRFAILPA	8		Cause of Graft Failure
GRF_PLACEM	RECIPIENT GRAFT PLACEMENT PROCEDURE @ TX	TRR	1987-10-01		TRANSPLANT CLINICAL INFORMATION	NUM	PAGRFPLA	8	6.	TRR GRAFT PLACEMENT
GRF_STAT_KI	RECIPIENT GRAFT STATUS FROM FORM-KI	TRR	1994-04-01		POST TRANSPLANT CLINICAL INFORMATION	CHAR	$GRFSTAT	1		TRR/TRF GRAFT STATUS
GRF_STAT_PA	RECIPIENT GRAFT STATUS FROM FORM-PA	TRR	1994-04-01		POST TRANSPLANT CLINICAL INFORMATION	CHAR	$GRFSTAT	1		TRR/TRF GRAFT STATUS
GRF_VASC_THROMB_PA	RECIPIENT GRAFT FAILURE CONTRIBUTORY CAUSE:GRAFT/VASCULAR THROMBOSIS-PA	TRR/TRF	1994-04-01		POST TRANSPLANT CLINICAL INFORMATION	CHAR		1		GRAFT FAILURE CONTRIBUTORY CAUSE - Pancreas: GRAFT/VASCULAR THROMBOSIS
GSTATUS_KI	GRAFT FAILED (1=YES)-KIDNEY	CALCULATED				NUM		8		"BOOLEAN: GRAFT STATUS
GSTATUS_PA	GRAFT FAILED (1=YES)-PANCREAS	CALCULATED				NUM		8		"BOOLEAN: GRAFT STATUS
GTIME_KI	GRAFT LIFESPAN-KIDNEY-Days From Transplant to Failure/Death/Last Follow-Up	CALCULATED				NUM		8		Graft Survival Time (days) - Kidney
GTIME_PA	GRAFT LIFESPAN-PANCREAS-Days From Transplant to Failure/Death/Last Follow-Up	CALCULATED				NUM		8		Graft Survival Time (days) - Pancreas
HAPLO_TY_MATCH_DON	LIVING DONOR-RECIPIENT HAPLOTYPE MATCH	DH	1987-10-01		RECIPIENT OF A LIVING DONOR INFORMATION	NUM	HAPLOTY	8	6.	DH RECIPIENT HAPLOTYPE MATCH WITH LD
HBA1C_PA_TCR	HBA1C AT LISTING (PA KP ONLY)	TCR	2018-02-28		CLINICAL INFORMATION AT LISTING	NUM		8	5.1	TCR HbA1c (%)
HBA1C_PA_TRR	HBA1C AT TRANSPLANT (PA KP ONLY)	TRR/TRF	2018-02-28		POST TRANSPLANT CLINICAL INFORMATION	NUM		8	5.1	TRR/TRF HbA1c (%)
HBSAB_DON	DECEASED DONOR HBSAB TEST RESULT	DDR	2006-05-03		CLINICAL INFORMATION	CHAR	$SERSTAT	2	$2.	DDR: HBSAB
HBV_CORE	RECIPIENT HEPATITIS B-CORE ANTIBODY	TRR	1987-10-01		CLINICAL INFORMATION	CHAR	$SERSTAT	2	$2.	TRR HBV CORE
HBV_CORE_DON	DONOR HBV CORE ANTIBODY	DDR/LDR	1994-04-01		CLINICAL INFORMATION	CHAR	$SERSTAT	2	$2.	DDR, LDR HBV CORE ANTIBODY (P, N, ND, U)
HBV_DNA_DON	LIVING DONOR HBV DNA	LDR	1994-04-01		CLINICAL INFORMATION	CHAR	$SERSTAT	2	$2.	LDR HBV DNA (P,N,ND,U)
HBV_NAT	TRR HBV NAT RESULT	TRR	2018-02-28		PRETRANSPLANT CLINICAL INFORMATION	CHAR		2	$2.	TRR HBV NAT RESULT
HBV_NAT_DON	DDR HBV NAT Results:	DDR	2015-03-31		CLINICAL INFORMATION	CHAR	$SERSTAT	2		DDR HBV NAT Results:
HBV_SUR_ANTIGEN	RECIPIENT HEP B SURFACE ANTIGEN	TRR	1987-10-01		CLINICAL INFORMATION	CHAR	$SERSTAT	2	$2.	TRR HBV SURFACE ANTIGEN
HBV_SUR_ANTIGEN_DON	DONOR HEP B SURFACE ANTIGEN	DDR/LDR	1987-10-01		CLINICAL INFORMATION	CHAR	$SERSTAT	2	$2.	CDR,LDR HBV SURFACE ANTIGEN (P,N,ND,U)
HBV_SURF_TOTAL	RECIPIENT HBV Surface Antibody Total @ TRANSPLANT	TRR	2015-03-31		CLINICAL INFORMATION	CHAR	$SERSTAT	2	$2.	TRR HBV Surface Antibody Total
HBV_TEST_DON	LIVING DONOR HBV TEST DONE	LDR	1994-04-01		CLINICAL INFORMATION	CHAR		1	$1.	LDR HBV TESTED (Y,N,U)
HCV_ANTIBODY_DON	LIVING DONOR HEP C ANTIBODY	LDR	1994-04-01		CLINICAL INFORMATION	CHAR	$SERSTAT	2	$2.	LDR HCV ANTIBODY (P,N,ND,U)
HCV_NAT	TRR HCV NAT RESULT	TRR	2018-02-28		PRETRANSPLANT CLINICAL INFORMATION	CHAR		2	$2.	TRR HCV NAT RESULT
HCV_NAT_DON	DDR HCV NAT Results:	DDR	2015-03-31		CLINICAL INFORMATION	CHAR	$SERSTAT	2		DDR HCV NAT Results:
HCV_RIBA_DON	LIVING DONOR HEP C-RIBA TEST	LDR	1994-04-01		CLINICAL INFORMATION	CHAR	$SERSTAT	2	$2.	LDR HCV RIBA (P,N,ND,U)
HCV_RNA_DON	LIVING DONOR HEP C RNA	LDR	1994-04-01		CLINICAL INFORMATION	CHAR	$SERSTAT	2	$2.	LDR HCV RNA (P,N,ND,U)
HCV_SEROSTATUS	RECIPIENT HEP C STATUS	TRR	1994-04-01		CLINICAL INFORMATION	CHAR	$SERSTAT	1	$2.	HCV_SEROSTATUS
HCV_TEST_DON	LIVING DONOR HEP C TEST DONE?	LDR	1994-04-01		CLINICAL INFORMATION	CHAR		1	$1.	LDR HCV TESTED (Y,N,U)
HEP_C_ANTI_DON	DECEASED DONOR-ANTIBODY TO HEP C VIRUS RESULT	DDR	1994-04-01		CLINICAL INFORMATION	CHAR	$SERSTAT	2	$2.	DON ANTI - HCV
HEPARIN_DON	DECEASED DONOR MANAGEMENT - HEPARIN (NO COLLECTION BETWEEN 10/25/99 - 1/27/03)	DDR	1994-04-01		CLINICAL INFORMATION	CHAR		1	$1.	DDR PRERECOVERY HEPARIN :NOT COLLECTED 10/25/99-1/25/03
HGT_CM_CALC	CALCULATED RECIPIENT HEIGHT(cm)	CALCULATED				NUM		8	8.1	Calculated Recipient Height (cm)
HGT_CM_DON_CALC	CALCULATED DONOR HEIGHT (CM)	CALCULATED				NUM		8	8.1	Calculated Donor Height
HGT_CM_TCR	RECIPIENT HEIGHT @ REGISTRATION	TCR	1987-10-01		CLINICAL INFORMATION	NUM		8	9.4	TCR HEIGHT IN CM://HEIGHT
HIST_ALCOHOL_OLD_DON	DECEASED DONOR-HISTORY OF ALCOHOL DEPENDENCY	DDR	1994-04-01	2004-06-29	DONOR HISTORY	CHAR		1	$1.	ARCHIVED DDR HIST ALCOHOL DON (Y, N, U)
HIST_CANCER_DON	DECEASED DONOR-HISTORY OF CANCER (Y/N)	DDR	1994-04-01		DONOR HISTORY	CHAR		1	HISTCAN	DR: HISTORY OF CANCER
HIST_CIG_DON	DECEASED DONOR-HISTORY OF CIGARETTES IN PAST @ >20PACK YRS	DDR	1994-04-01		DONOR HISTORY	CHAR		1	$1.	HISTORY OF CIGARETTE USE
HIST_COCAINE_DON	DECEASED DONOR-HISTORY OF COCAINE USE IN PAST	DDR	1999-10-25		DONOR HISTORY	CHAR		1	$1.	HISTORY OF COCAIN (Y/N)
HIST_DIABETES_DON	DECEASED DONOR-HISTORY OF DIABETES, INCL. DURATION OF DISEASE	DDR	1994-04-01		DONOR HISTORY	NUM	HISTDIAB	8	6.	DDR HISTORY OF DIABETES
HIST_HYPERTENS_DON	DECEASED DONOR-HISTORY OF HYPERTENSION (Y,N)	DDR	1994-04-01		DONOR HISTORY	CHAR		1		HISTORY OF HYPERTENSION
HIST_INSULIN_DEP_DON	DECEASED DONOR-INSULIN DEPENDENT DIABETES (Y,N)	DDR	1994-04-01		DONOR HISTORY	CHAR		1		INSULIN DEPENDENT (Y,N)	UNROLLED FROM INSULIN_DUR_DON TO INCLUDE ONLY THE Y,N RESPONSE
HIST_IV_DRUG_OLD_DON	DECEASED DONOR-HISTORY OF IV DRUG USE IN PAST	DDR	1994-04-01	2004-06-29	DONOR HISTORY	CHAR		1	$1.	ARCHIVED DDR HIST IV DON (Y, N, U)
HIST_OTH_DRUG_DON	DECEASED DONOR-HISTORY OF OTHER DRUG USE IN PAST	DDR	1994-04-01		DONOR HISTORY	CHAR		1	$1.	HISTORY OF OTHER DRUG USE (Y/N)
HIV_NAT	TRR HIV NAT RESULT	TRR	2018-02-28		PRETRANSPLANT CLINICAL INFORMATION	CHAR		2	$2.	TRR HIV NAT RESULT
HIV_NAT_DON	DDR HIV NAT Results:	DDR	2015-03-31		CLINICAL INFORMATION	CHAR	$SERSTAT	2	$2.	DDR HIV NAT Results:
HIV_SEROSTATUS	RECIPIENT HIV SEROSTATUS AT TRANSPLANT	TRR	1987-10-01		CLINICAL INFORMATION	CHAR		2	$2.	TRR HIV SEROSTATUS:
HLAMIS	HLA MISMATCH LEVEL	CALCULATED				NUM		3		HLA Mismatch Level
HMO_PPO_DON	LIVING DONOR-HMO/PPO AS SECONDARY PAYMENT TYPE	LDR	1999-10-25		DONOR INFORMATION	CHAR		1	$1.	LDR HMO/PPO SECONDARY SOURCE OF PAYMENT
HOME_STATE_DON	DR HOME STATE	DDR/LDR	1987-10-01		DONOR INFORMATION	CHAR	$STATE	2	$2.	DR HOME STATE
HTLV1_OLD_DON	DECEASED DONOR-ANTIBODY TO HTLV I RESULT	DDR	1994-04-01		CLINICAL INFORMATION	CHAR	$SERSTAT	2	$2.	ARCHIVED DDR HTLV I (P,N,U,C,ND,I)
HTLV2_OLD_DON	DECEASED DONOR-ANTIBODY TO HTLV II RESULT	DDR	1994-04-01		CLINICAL INFORMATION	CHAR	$SERSTAT	2	$2.	ARCHIVED DDR HTLV I (P,N,U,C,ND,I)
HYPERTENS_DUR_DON	DECEASED DONOR-HYPERTENSION DURATION	DDR	1994-04-01		DONOR HISTORY	NUM	HISTHYPE	8		DDR HYPERTENSION DURATION
INACT_REASON_CD	REASON FOR INACTIVE STATUS	WAITING LIST DATA	2006-05-24		WAITING LIST DATA	NUM	INACTREA	6	6.	REASON FOR INACTIVE STATUS
INFECT_PA	RECIPIENT GRAFT FAILURE CONTRIBUTORY CAUSE:INFECTION-PA	TRR	1994-04-01		POST TRANSPLANT CLINICAL INFORMATION	CHAR		1		GRAFT FAILURE CONTRIBUTORY CAUSE- Pancreas: INFECTION: pre 1/1/2007
INIT_AGE	CANDIDATE AGE IN YEARS AT TIME OF LISTING	WAITING LIST DATA	1987-10-01		WAITING LIST DATA	NUM		8	3.	CALCULATED AGE AT LISTING
INIT_BMI_CALC	CALCULATED CANDIDATE BMI AT LISTING	CALCULATED				NUM		8	8.1	Calculated Candidate BMI at Listing
INIT_CPRA	CANDIDATE CALCULATED PRA AT LISTING	CALCULATED	2007-12-05			NUM		4		Candidate First Calculated PRA (since 12/5/07)	CPRA is used in allocation since to 10/1/2009
INIT_CURRENT_PRA	CANDIDATE FIRST CURRENT PRA	WAITING LIST DATA				NUM		8	6.	Candidate First Current PRA (prior 10/1/2009)	PRA was used in allocation prior to 10/1/2009
INIT_DATE	DATE PLACED ON WAITING LIST	WAITING LIST DATA	1987-10-01		WAITING LIST DATA	NUM		8	MMDDYY10.	Beginning Date for Registration
INIT_EPTS	Initial Calculated EPTS (since 5/27/2014)	WAITING LIST DATA	2014-05-27		WAITING LIST DATA	NUM		8	5.2	Initial Calculated EPTS (since 5/27/2014)
INIT_HGT_CM	CANDIDATE HEIGHT IN CM AT LISTING	WL/TCR	1987-10-01			NUM		8	9.4	WL/TCR CANDIDATE HEIGHT IN CM AT LISTING/TCR
INIT_OPO_CTR_CODE	ENCRYPTED INITIAL OPO MAPPED FROM LISTING CENTER AND BEGINNING DATE	CALCULATED				CHAR		12	$8.
INIT_PEAK_PRA	RECIPIENT PEAK PRA AT LISTING	WAITING LIST DATA	1995-05-01	2009-09-30		NUM		8	6.	WL PEAK PRA AT LISTING	PRA was used in allocation prior to 10/1/2009
INIT_STAT	INITIAL WAITING LIST STATUS CODE	WAITING LIST DATA	1990-01-01		WAITING LIST DATA	NUM	STAT	8	6.	WL WAITING LIST STATUS AT TIME OF LISTING
INIT_WGT_KG	CANDIDATE WEIGHT IN KG AT LISTING	WL/TCR	1987-10-01			NUM		8	9.4	WL/TCR CANDIDATE WEIGHT IN KG AT LISTING/TCR
INO_PROCURE_AGENT_1	DECEASED DONOR-INOTROPIC MEDICATION AGENT 1	DDR	2003-01-27		CLINICAL INFORMATION	NUM	INOMED	8		DDR INOTROPIC AGENT 1, AT PROCUREMENT
INO_PROCURE_AGENT_2	DECEASED DONOR-INOTROPIC MEDICATION AGENT 2	DDR	2003-01-27		CLINICAL INFORMATION	NUM	INOMED	8		DDR INOTROPIC AGENT 2, AT PROCUREMENT
INO_PROCURE_AGENT_3	DECEASED DONOR-INOTROPIC MEDICATION AGENT 3	DDR	2003-01-27		CLINICAL INFORMATION	NUM	INOMED	8		DDR INOTROPIC AGENT 3, AT PROCUREMENT
INO_PROCURE_OSTXT_1	DECEASED DONOR-INOTROPIC MEDICATION AGENT 1, SPECIFY	DDR	2003-01-27		CLINICAL INFORMATION	CHAR		40		DDR INOTROPIC AGENT 1 OSTXT, AT PROCUREMENT
INO_PROCURE_OSTXT_2	DECEASED DONOR-INOTROPIC MEDICATION AGENT 2, SPECIFY	DDR	2003-01-27		CLINICAL INFORMATION	CHAR		40		DDR INOTROPIC AGENT 2 OSTXT, AT PROCUREMENT
INO_PROCURE_OSTXT_3	DECEASED DONOR-INOTROPIC MEDICATION AGENT 3, SPECIFY	DDR	2003-01-27		CLINICAL INFORMATION	CHAR		40		DDR INOTROPIC AGENT 3 OSTXT, AT PROCUREMENT
INOTROP_AGENTS	DECEASED DONOR-INOTROPIC AGENT SUPPORT	DDR	1999-10-25		HEART DONOR'S CARDIAC FUNCTION	CHAR		1	$1.	DON THREE OR MORE INOTROPIC AGENTS AT TIME OF INCISION
INOTROP_SUPPORT_DON	DECEASED DONOR INOTROPIC MEDICATION AT PROCUREMENT (Y/N)	DDR	2003-01-27		CLINICAL INFORMATION	CHAR		1	$1.	DDR INOTROPIC MEDICATION AT PROCUREMENT
INSULIN_DEP_DON	DECEASED DONOR-INSULIN DEPENDENT DIABETES, INCL. DURATION OF DEPENDENCE	DDR	1994-04-01		DONOR HISTORY	NUM	INSDEPDU	8	6.	INSULIN DEPENDENT
INSULIN_DON	DECEASED DONOR-WAS DONOR GIVEN INSULIN WITHIN 24 HRS PRE CROSS CLAMP?	DDR	2004-06-30		CLINICAL INFORMATION	CHAR		1	$1.	DDR:Insulin:
INSULIN_DOSAGE_OLD_PA	PANCREAS OLD TOTAL INSULIN DOSAGE UNITS	TRR/TRF		2021-06-23	CLINICAL INFORMATION	NUM		8	8.2	TRR/TRF PANCREAS TOTAL INSULIN DOSAGE UNITS (units prior 6/23/2021)
INSULIN_DOSAGE_PA	PANCREAS TOTAL INSULIN DOSAGE UNITS	TRR/TRF	2018-02-28		CLINICAL INFORMATION	NUM		6	6.	TRR/TRF PANCREAS TOTAL INSULIN DOSAGE UNITS (units kg/day since 6/23/2021)
INSULIN_DUR_DON	DECEASED DONOR-INSULIN DEPENDENT DIABETES DURATION	DDR	1994-04-01		DONOR HISTORY	NUM	INSDEPDU	8		INSULIN DURATION	UNROLLED FROM INSULIN_DUR_DON TO INCLUDE DURATION OF DEPENDENCE
INSULIN_DURATION_PA	PANCREAS INSULIN DURATION OF USE	TRR/TRF	2018-02-28		CLINICAL INFORMATION	NUM		6	6.	TRR/TRF PANCREAS INSULIN DURATION OF USE
INSULIN_PA	PANCREAS PATIENT ON INSULIN	TRR/TRF	2004-06-30		CLINICAL INFORMATION	CHAR		1	$1.	TRR/TRF PANCREAS PATIENT ON INSULIN
INSULIN_RESUMED_DATE_PA	PANCREAS DATE INSULIN RESUMED	TRR/TRF	2004-06-30		CLINICAL INFORMATION	NUM		8	MMDDYY10.	TRR/TRF PANCREAS DATE INSULIN RESUMED
INTRACRANIAL_CANCER_DON	DECEASED DONOR-INTRACANIAL CANCER AT PROCUREMENT	DDR	1994-04-01		DONOR HISTORY	CHAR		1	$1.	DDR INTRACANIAL CANCER AT PROCUREMENT
KDPI	KDPI (ref. population = 2020) Calculated from DDR or from DonorNet: Post 04/01/1994	CALCULATED	1994-04-01			8	PERCENT7.			KDPI (ref. population = 2020) Calculated from DDR or from DonorNet: Post 04/01/1994	added with 201409 STAR file (see https://optn.transplant.hrsa.gov/media/1512/guide_to_calculating_interpreting_kdpi.pdf)
KDRI_MED	KDRI Median (ref. donor = 2020 median) Calculated from DDR or from DonorNet: Post 04/01/1994	CALCULATED	1994-04-01			8				KDRI Median (ref. donor = 2020 median) Calculated from DDR or from DonorNet: Post 04/01/1994	added with 201409 STAR file (see https://optn.transplant.hrsa.gov/media/1512/guide_to_calculating_interpreting_kdpi.pdf)
KDRI_RAO	KDRI Rao Calculated from DDR or from DonorNet: Post 04/01/1994	CALCULATED	1994-04-01			8				KDRI Rao Calculated from DDR or from DonorNet: Post 04/01/1994	added with 201409 STAR file (see https://optn.transplant.hrsa.gov/media/1512/guide_to_calculating_interpreting_kdpi.pdf)
KI_CREAT_PREOP	LIVING KIDNEY DONOR PREOPERATIVE CREATININE	LDR	1999-10-25		CLINICAL INFORMATION	NUM		8	10.2	DON KIDNEY PREOPERATIVE CREATINE
KI_PROC_TY	LIVING DONOR KIDNEY PROCEDURE TYPE	LDR	1999-10-25		CLINICAL INFORMATION	NUM	KIPROCTY	8	6.	DON KIDNEY PROCEDURE TYPE
L_FIN_FLOW_RATE_TX	Left Kidney Final Flow Rate at Transplant	TRR	2015-03-31		TRANSPLANT CLINICAL INFORMATION	NUM		8	7.2	TRR Left Kidney Final Flow Rate at Transplant
L_FIN_RESIST_TX	Left Kidney Final Resistance at Transplant	TRR	2015-03-31		TRANSPLANT CLINICAL INFORMATION	NUM		8	7.2	TRR Left Kidney Final Resistance at Transplant
LIPASE	DECEASED PANCREAS DONOR SERUM LIPASE (PA DONORS ONLY)	DDR	1999-10-25		CLINICAL INFORMATION	NUM		8	10.2	DON SERUM LIPASE (PA DONORS ONLY)
LISTING_CTR_CODE	ENCRYPTED WL LISTING CENTER	CALCULATED				CHAR		8	$8.
LIV_DON_TY	LIVING DONOR RELATION TO RECIPIENT	LDR	1994-04-01		DONOR INFORMATION	NUM	LDONREL	8	6.	LDR LIVING DONOR TYPE
LIV_DON_TY_OSTXT	LIVING DONOR RELATION TO RECIPIENT TYPE SPECIFY	LDR	1994-04-01		DONOR INFORMATION	CHAR		50	50.	LDR DONOR TYPE/SPECIFY
LOS	RECIPIENT LENGTH OF STAY POST TX	TRR-CALCULATED	1999-10-25		PATIENT STATUS(PRIORITY KIDNEY,THEN PANCREAS TRR)	NUM		8		Length of stay Tx to Discharge: Post UNET
LT_KI_BIOPSY	DECEASED DONOR-LEFT KIDNEY BIOPSY AT RECOVERY	DDR	1999-10-25		ORGAN RECOVERY	CHAR		1	$1.	DON KIDNEY BIOPSY (LEFT)
LT_KI_GLOMERUL	DECEASED DONOR-LEFT KIDNEY %GLOMERULOSCLEROSIS AT RECOVERY	DDR	1999-10-25		ORGAN RECOVERY	NUM	KIGLUMER	8	6.	DON % GLOMERULOSCLEROSIS (LEFT KIDNEY)
LT_ONE_WEEK_DON	Donor Less Than 7 Days Old at Time of Donation	CALCULATED	2016-09-13			CHAR		1	$1.
MALIG	ANY PREVIOUS MALIGNANCY?	CALCULATED				CHAR		1		CALCULATED: ANY PREVIOUS MALIGNANCY?
MALIG_OSTXT_TRR	TRR MALIGNANCY TYPE TEXT	TRR	2004-06-30		PRETRANSPLANT CLINICAL INFORMATION	CHAR		50	$50.	TRR MALIG. TYPE TEXT
MALIG_TCR_KI	RECIPIENT PREVIOUS MALIG. @ REGISTRATION (KIDNEY)	TCR	1994-04-01		CLINICAL INFORMATION	CHAR		1	$1.	TCR PREVIOUS MALIG.
MALIG_TCR_PA	RECIPIENT PREVIOUS MALIG. @ REGISTRATION (PANCREAS)	TCR	1994-04-01		CLINICAL INFORMATION	CHAR		1	$1.	TCR PREVIOUS MALIG.
MALIG_TRR	RECIPIENT ANY KNOWN MALIGNANCIES SINCE LISTING @ TRANSPLANT	TRR	1999-10-25		PRETRANSPLANT CLINICAL INFORMATION	CHAR		1	$1.	TRR ANY KNOWN MALIG. SINCE LISTING
MALIG_TY	PREVIOUS MALIGNANCY TYPE	CALCULATED				NUM	MALMULTIPED	8		CALCULATED: ANY PREVIOUS MALIGNANCY TYPE
MALIG_TY_OSTXT	PREVIOUS MALIGNANCY TYPE TEXT	CALCULATED				CHAR		50		CALCULATED: ANY PREVIOUS MALIGNANCY TEXT
MALIG_TY_TRR	TYPE OF MALIGNANCY BETWEEN LISTING AND TRANSPLANT	TRR	2004-06-30		PRETRANSPLANT CLINICAL INFORMATION	NUM	MALMULTIPED	8		TRR MALIG TYPE
MAX_KDPI_IMPORT_NON_ZERO_ABDR	WL Maximum Acceptable KDPI for Import non-0 ABDR Mismatch (since 5/27/2014)	WAITING LIST DATA	2014-05-27		WAITING LIST DATA	NUM		8	11.	WL Maximum Acceptable KDPI for Import non-0 ABDR Mismatch (since 5/27/2014)
MAX_KDPI_IMPORT_ZERO_ABDR	WL Maximum Acceptable KDPI for Import 0 ABDR Mismatch (since 5/27/2014)	WAITING LIST DATA	2014-05-27		WAITING LIST DATA	NUM		8	11.	WL Maximum Acceptable KDPI for Import 0 ABDR Mismatch (since 5/27/2014)
MAX_KDPI_LOCAL_NON_ZERO_ABDR	WL Maximum Acceptable KDPI for Local non-0 ABDR Mismatch (since 5/27/2014)	WAITING LIST DATA	2014-05-27		WAITING LIST DATA	NUM		8	11.	WL Maximum Acceptable KDPI for Local non-0 ABDR Mismatch (since 5/27/2014)
MAX_KDPI_LOCAL_ZERO_ABDR	WL Maximum Acceptable KDPI for Local 0 ABDR Mismatch (since 5/27/2014)	WAITING LIST DATA	2014-05-27		WAITING LIST DATA	NUM		8	11.	WL Maximum Acceptable KDPI for Local 0 ABDR Mismatch (since 5/27/2014)
MED_COND_TRR	RECIPIENT MEDICAL CONDITION PRE-TRANSPLANT @ TRANSPLANT	TRR	1987-10-01	2015-03-31	PATIENT STATUS	NUM	MEDCOND	8		TRR Medical Condition
MEDICAID_DON	LIVING DONOR-MEDICAID AS SECONDARY PAYMENT TYPE	LDR	1999-10-25		DONOR INFORMATION	CHAR		1	$1.	LDR MEDICAID SECONDARY SOURCE OF PAYMENT
MEDICARE_DON	LIVING DONOR-MEDICARE AS SECONDARY PAYMENT TYPE	LDR	1999-10-25		DONOR INFORMATION	CHAR		1	$1.	LDR MEDICARE SECONDARY SOURCE OF PAYMENT
METHOD_BLOOD_SUGAR_CONTROL_PA	PANCREAS PATIENT USING ANY METHOD OF BLOOD SUGAR CONTROL	TRR/TRF	1994-04-01		CLINICAL INFORMATION	NUM		8	6.	TRR/TRF PANCREAS PATIENT USING ANY METHOD OF BLOOD SUGAR CONTROL
MULTIORG	MULTI-ORGAN TRANSPLANT	CALCULATED				CHAR		1		MULTI-ORGAN TRANSPLANT
NON_HRT_DON	DECEASED DONOR-NON-HEART BEATING DONOR	DDR	1994-04-01		ORGAN RECOVERY	CHAR		1	$1.	DDR NON-HEART BEATING
NPKID	NUMBER PREVIOUS TXs -KIDNEY	CALCULATED				NUM		3		Number prev TXs - Kid
NPPAN	NUMBER PREVIOUS TXs -PANCREAS	CALCULATED				NUM		3		Number prev TXs - Pan
NUM_PREV_TX	THE NUMBER OF PREVIOUS TRANSPLANTS	WAITING LIST DATA	1987-10-01		WAITING LIST DATA	NUM		8	3.	WL NUMBER PREVIOUS TRANSPLANTS
ON_DIALYSIS	WL Candidate Has Had Regularly Administered Dialysis for ESRD (Y/N)	WAITING LIST DATA			WAITING LIST DATA	CHAR		1	$1.	WL Candidate Has Had Regularly Administered Dialysis for ESRD
OPER_TECH	RECIPIENT OPERATIVE TECHNIQUE FOR PANCREAS TX	TRR	1987-10-01		TRANSPLANT CLINICAL INFORMATION	NUM	PATXTY	8	6.	TRR OPERATIVE TECHNIQUE
OPO_CTR_CODE	ENCRYPTED OPO CENTER CODE (OPO OF THE DECEASED DONOR RECOVERY FROM DDR FORM)	CALCULATED				CHAR		8
ORG_REC_ON	KIDNEY RECEIVED ON ICE OR PUMP	TRR	2004-06-30		CLINICAL INFORMATION	NUM	ORGRECON	8	6.	KIDNEY(S) RECEIVED ON ICE OR PUMP
ORGAN	ORGAN TYPE TRANSPLANTED	CALCULATED				CHAR		2		Organ Transplanted
OTH_COMPL_OSTXT	RECIPIENT-PANCREAS TRANSPLANT COMPLICATION-OTHER TYPE SPECIFIED	TRR	1994-04-01		POST TRANSPLANT CLINICAL INFORMATION	CHAR		50	$50.	TRR PANCREAS TRANSPLANT COMPLICATIONS: OTHER
OTH_DON_MED1_OSTXT_DON_OLD	DECEASED DONOR OTHER MEDICATIONS1 W/IN 24 HRS PRE-CROSS CLAMP	DDR	1994-04-01	2003-01-27	CLINICAL INFORMATION	CHAR		50	$50.	ARCHIVED DDR OTHER MEDICATIONS1 PRE CROSS CLAMP
OTH_DON_MED2_OSTXT_DON_OLD	DECEASED DONOR OTHER MEDICATIONS2 W/IN 24 HRS PRE-CROSS CLAMP	DDR	1994-04-01	2003-01-27	CLINICAL INFORMATION	CHAR		50	$50.	ARCHIVED DDR OTHER MEDICATIONS2 PRE CROSS CLAMP
OTH_DON_MED3_OSTXT_DON_OLD	DECEASED DONOR OTHER MEDICATIONS3 W/IN 24 HRS PRE-CROSS CLAMP	DDR	1994-04-01	2003-01-27	CLINICAL INFORMATION	CHAR		50	$50.	ARCHIVED DDR OTHER MEDICATIONS3 PRE CROSS CLAMP
OTH_GOVT_DON	LIVING DONOR - US/STATE GOVERNMENT AGENCY AS SECONDARY PAYMENT TYPE	LDR	1999-10-25		DONOR INFORMATION	CHAR		1	$1.	LDR OTHER GOVERNMENT SECONDARY SOURCE OF PAYMENT
OTH_GRF_FAIL_CAUSE_OSTXT_PA	RECIPIENT GRAFT FAILURE CONTRIBUTORY CAUSE: OTHER SPECIFIED-PA	TRR/TRF	1987-10-01		POST TRANSPLANT CLINICAL INFORMATION	CHAR		50		OTHER CONTRIBUTORY GRAFT FAIL CAUSE TEXT - Pancreas: pre 1/1/2007
OTHER_HYPERTENS_MED_DON	DECEASED DONOR-HYPERTENSION CONTROLLED BY NON-DIURETIC MEDS	DDR	1994-04-01		DONOR HISTORY	CHAR		1	$1.	DDR HYPERTENSIVE CONTROLLED WITH OTHER MEDS
OTHER_INF_CONF_DON	DECEASED DONOR INFECTION OTHER SOURCE-CONFIRMED	DDR	1994-04-01	2015-03-31	CLINICAL INFORMATION	CHAR		1	$1.	DDR INFECTION OTHER SOURCE-CONFIRMED
OTHER_INF_DON	DECEASED DONOR INFECTION OTHER SOURCE	DDR	1994-04-01		CLINICAL INFORMATION	NUM		8	1.	DDR INFECTION OTHER SOURCE
OTHER_INF_OSTXT_DON	DECEASED DONOR INFECTION OTHER SOURCE, SPECIFIED	DDR	1994-04-01		CLINICAL INFORMATION	CHAR		50	$50.	DDR INFECTION OTHER SOURCE TEXT
PA_PRESERV_TM	PANCREAS TOTAL PRESERVATION TIME (HOURS)	TRR	1987-10-01		TRANSPLANT CLINICAL INFORMATION	NUM		8	10.2	TRR PRESERV TIME
PANCREATIT_PA	RECIPIENT GRAFT FAILURE CONTRIBUTORY CAUSE:PANCREATITIS	TRR/TRF	1990-08-30		POST TRANSPLANT CLINICAL INFORMATION	CHAR		1		GRAFT FAILURE CONTRIBUTORY CAUSE- Pancreas:PANCREATITIS
PAYBACK	TRANSPLANT AS A RESULT OF A PAYBACK?	CALCULATED	2000-07-01			CHAR		1		TX AS A RESULT OF A PAYBACK (Y/N)
PEAK_PRA	CANDIDATE MOST RECENT "PEAK" PRA FROM WAITING LIST/ALLOCATION	WAITING LIST DATA	1987-10-01	2009-09-30	WAITING LIST DATA	NUM		8	6.	WL Candidate PEAK PRA	PRA was used in allocation prior to 10/1/2009
PERIP_VASC	RECIPIENT PERIPHERAL VASCULAR DISEASE @ REGISTRATION	TCR	1994-04-01		CLINICAL INFORMATION	CHAR		1	$1.	TCR PERIPHERAL VASCULAR DISEASE
PERM_STATE	CANDIDATE STATE OF RESIDENCY @ REGISTRATION	TCR	1997-10-01		CANDIDATE INFORMATION	CHAR	$STATE	2	$2.	TCR State of Permanent Residence at Listing
PERM_STATE_TRR	RECIPIENT STATE OF RESIDENCY @ TRANSPLANT	TRR	2004-06-30		CANDIDATE INFORMATION	CHAR	$STATE	2	$2.	TRR STATE OF RESIDENCY
PK_DA1	PREVIOUS KIDNEY-DONOR A1 ANTIGEN	CALCULATED				CHAR		6		Prev Kid dA1 Antigen
PK_DA2	PREVIOUS KIDNEY-DONOR A2 ANTIGEN	CALCULATED				CHAR		6		Prev Kid dA2 Antigen
PK_DB1	PREVIOUS KIDNEY-DONOR B1 ANTIGEN	CALCULATED				CHAR		6		Prev Kid dB1 Antigen
PK_DB2	PREVIOUS KIDNEY-DONOR B2 ANTIGEN	CALCULATED				CHAR		6		Prev Kid dB2 Antigen
PK_DDR1	PREVIOUS KIDNEY-DONOR DR1 ANTIGEN	CALCULATED				CHAR		6		Prev Kid dDR1 Antigen
PK_DDR2	PREVIOUS KIDNEY-DONOR DR2 ANTIGEN	CALCULATED				CHAR		6		Prev Kid dDR2 Antigen
PRE_AVG_INSULIN_USED_OLD_TRR	RECIPIENT OLD AVERAGE DAILY INSULIN UNITS PRE TRANSPLANT @ TRANSPLANT	TRR		2021-06-23	PRETRANSPLANT CLINICAL INFORMATION	NUM		8	10.2	TRR PREVIOUS AVERAGE INSULIN USED (units prior 6/23/2021)
PRE_AVG_INSULIN_USED_TRR	RECIPIENT AVERAGE DAILY INSULIN UNITS PRE TRANSPLANT @ TRANSPLANT	TRR	1999-10-25		PRETRANSPLANT CLINICAL INFORMATION	NUM		8	10.2	TRR PREVIOUS AVERAGE INSULIN USED (units/kg/day since 6/23/2021)
PRE_TX_TXFUS	RECIPIENT # OF PRE-TRANSPLANT TRANSFUSIONS-KI @ TRANSPLANT	TRR	1987-10-01	2015-03-31	PRETRANSPLANT CLINICAL INFORMATION	CHAR		1	$1.	TRR Pre-Transplant Transfusions
PRETREAT_MED_DON_OLD	DECEASED DONOR PRE-RECOVERY MEDICATION(S) FROM BRAIN DEATH TO 24 HRS PRIOR TO PROCUREMENT	DDR	1994-04-01	2003-01-27	CLINICAL INFORMATION	CHAR		1	$1.	ARCHIVED DDR PRERECOVERY MEDICATION (Y/N)
PREV_KI_DATE	RECIPIENT PREVIOUS KIDNEY TRANSPLANT-MOST RECENT DATE	CALCULATED				NUM		8	MMDDYY10.	CALC KI: MOST RECENT TRANSPLANT DATE
PREV_KI_TX	IF KI OR KP TRANSPLANT IS THERE A HISTORY OF KI or KP TRANSPLANT	CALCULATED				CHAR		1		CALC FOR KI AND KP TX:Previous KI or KP tx
PREV_MALIG_TY	ANY PREVIOUS MALIGANCY TYPE AT REGISTRATION	TCR	2004-06-30		CLINICAL INFORMATION	NUM	MALMULTIPED	8	6.	TCR TYPE OF PREVIOUS MALIGNANCY
PREV_MALIG_TY_OSTXT	ANY PREVIOUS MALIGANCY TYPE AT REGISTRATION TEXT	TCR	2004-06-30		CLINICAL INFORMATION	CHAR		50	$50.	TCR TYPE OF PREVIOUS MALIGNANCY TEXT
PREV_PA_TX	IF PA OR KP TRANSPLANT IS THERE A HISTORY of PA or KP TX	CALCULATED				CHAR		1		CALC FOR PA AND KP TX:Previous PA or KP tx
PREV_PREG	RECIPIENT NUMBER OF PREVIOUS PREGNANCIES-KI @ TRANSPLANT	TRR	1987-10-01		PRETRANSPLANT CLINICAL INFORMATION	NUM	PREVPREG	8	6.	TRR Previous Pregancies
PREV_TX	HISTORY of a PREVIOUS TRANSPLANT INVOLVING EXACT SAME ORGAN AS CURRENT TX	CALCULATED				CHAR		1		CALC KI:Prev KIorKP;PA:Prev PAorKP;KP:Prev KP
PREV_TX_ANY	CALCULATED Previous Transplant of Any Organ Type	CALCULATED				CHAR		1		CALCULATED Previous Transplant of Any Organ Type
PREV_TX_ANY_N	CALCULATED Number of Previous Transplanted of any Organ Type in OPTN Database	CALCULATED				NUM		8		CALCULATED Number of Previous Transplanted of any Organ Type in OPTN Database
PRI_PAYMENT_CTRY_DON	LIVING DONOR- FOREIGN GOVERNMENT, SPECIFIED	LDR	1999-10-25		DONOR INFORMATION	CHAR	$CTRY	3	$3.	LDR COUNTRY PRIMARY PAYMENT SOURCE
PRI_PAYMENT_CTRY_TCR_KI	RECIPIENT-FOREIGN GOVERNMENT AS PROJECTED PAYMENT SOURCE-KI @ REGISTRATION	TCR	1987-10-01		CANDIDATE INFORMATION	CHAR	$CTRY	3	$3.	TCR Other Dov't Payment Text
PRI_PAYMENT_CTRY_TCR_PA	RECIPIENT-FOREIGN GOVERNMENT AS PROJECTED PAYMENT SOURCE-PA @ REGISTRATION	TCR	1987-10-01		CANDIDATE INFORMATION	CHAR	$CTRY	3	$3.	TCR FOREIGN DOV'T PAYMENT TEXT
PRI_PAYMENT_CTRY_TRR_KI	RECIPIENT FOREIGN COUNTRY SPECIFIED AS PRIMARY PAYMENT SOURCE-KI @ TRANSPLANT	TRR	1999-10-25		PATIENT STATUS	CHAR	$CTRY	3	$3.	TRR Other Dov't Payment Text
PRI_PAYMENT_CTRY_TRR_PA	RECIPIENT FOREIGN COUNTRY SPECIFIED AS PRIMARY PAYMENT SOURCE-PA @ TRANSPLANT	TRR	1999-10-25		PATIENT STATUS	CHAR	$CTRY	3	$3.	TRR FOREIGN DOV'T PAYMENT TEXT
PRI_PAYMENT_DON	LIVING DONOR-PRIMARY PAYMENT TYPE	LDR	1999-10-25		DONOR INFORMATION	NUM	PRIMPAY	8	6.	LDR PRIMARY PAYMENT SOURCE
PRI_PAYMENT_TCR_KI	RECIPIENT-PRIMARY PROJECTED PAYMENT SOURCE-KI @ REGISTRATION	TCR	1994-04-01		CANDIDATE INFORMATION	NUM	PRIMPAY	8	6.	TCR PRIMARY PROJECTED SOURCE PAY
PRI_PAYMENT_TCR_PA	RECIPIENT-PRIMARY PROJECTED PAYMENT SOURCE-PA @ REGISTRATION	TCR	1994-04-01		CANDIDATE INFORMATION	NUM	PRIMPAY	8	6.	TCR PRIMARY PROJECTED SOURCE PAY
PRI_PAYMENT_TRR_KI	RECIPIENT PRIMARY PAYMENT SOURCE-KI @ TRANSPLANT	TRR	1994-04-01		PATIENT STATUS	NUM	PRIMPAY	8	6.	TRR PRIMARY SOURCE OF PAYMENT
PRI_PAYMENT_TRR_PA	RECIPIENT PRIMARY PAYMENT SOURCE-PA @ TRANSPLANT	TRR	1990-10-01		PATIENT STATUS	NUM	PRIMPAY	8	6.	TRR PRIMARY SOURCE OF PAYMENT
PRIV_INS_DON	LIVING DONOR-PRIVATE INSURANCE AS SECONDARY PAYMENT TYPE	LDR	1999-10-25		DONOR INFORMATION	CHAR		1	$1.	LDR PRIVATE INSURANCE SECONDARY SOURCE OF PAYMENT
PROTEIN_URINE	DECEASED DONOR PROTEIN IN URINE	DDR	1999-10-25		CLINICAL INFORMATION	CHAR		1	$1.	DON PROTEIN IN URINE
PRVTXDIF_KI	DAYS SINCE PREVIOUS TX -KIDNEY	CALCULATED				NUM		8		DAYS BETWEEN PREVIOUS AND CURRENT TX
PRVTXDIF_PA	DAYS SINCE PREVIOUS TX-PANCREAS	CALCULATED				NUM		8		DAYS BETWEEN PREVIOUS AND CURRENT TX
PSTATUS	Boolean Most Recent Patient Status (based on composite death date) (1=Dead, 0=Alive)	TRR/TRF-CALCULATED	1987-10-01		PATIENT STATUS	NUM		3		Boolean Most Recent Patient Status (based on composite death date)
PT_CODE	ENCRYPTED RECIPIENT IDENTIFIER	CALCULATED				NUM		8		ENCRYPTED RECIPIENT IDENTIFIER
PT_DIURETICS_DON	DECEASED DONOR-DIURETICS B/N BRAIN DEATH W/IN 24 HRS OF PROCUREMENT	DDR	1994-04-01		CLINICAL INFORMATION	CHAR		1	$1.	DDR PRERECOVERY DIURETICS
PT_OTH1_OSTXT_DON	DECEASED DONOR-OTHER MEDS B/N BRAIN DEATH W/IN 24 HRS OF PROCUREMENT #1	DDR	1994-04-01		CLINICAL INFORMATION	CHAR		50	$50.	DDR OTHER PRERECOVERY MEDS TEXT
PT_OTH2_OSTXT_DON	DECEASED DONOR-OTHER MEDS B/N BRAIN DEATH W/IN 24 HRS OF PROCUREMENT #2	DDR	1994-04-01		CLINICAL INFORMATION	CHAR		50	$50.	DDR OTHER PRERECOVERY MEDS TEXT
PT_OTH3_OSTXT_DON	DECEASED DONOR-OTHER MEDS B/N BRAIN DEATH W/IN 24 HRS OF PROCUREMENT #3	DDR	1994-04-01		CLINICAL INFORMATION	CHAR		50	$50.	DDR OTHER PRERECOVERY MEDS TEXT
PT_OTH4_OSTXT_DON	DECEASED DONOR-OTHER MEDS B/N BRAIN DEATH W/IN 24 HRS OF PROCUREMENT #4	DDR	1994-04-01		CLINICAL INFORMATION	CHAR		50	$50.	DDR OTHER PRERECOVERY MEDS TEXT
PT_STEROIDS_DON	DECEASED DONOR-STEROIDS B/N BRAIN DEATH W/IN 24 HRS OF PROCUREMENT	DDR	1994-04-01		CLINICAL INFORMATION	CHAR		1	$1.	DDR PRERECOVERY STEROIDS
PT_T3_DON	DECEASED DONOR-TRIIODOTHYRONINE-T3 B/N BRAIN DEATH W/IN 24 HRS OF PROCUREMENT	DDR	1999-10-25		CLINICAL INFORMATION	CHAR		1	$1.	DDR PRERECOVERY TRIIODOTHYRONINE-T3
PT_T4_DON	DECEASED DONOR-THYROXINE-T4 B/N BRAIN DEATH W/IN 24 HRS OF PROCUREMENT	DDR	1994-04-01		CLINICAL INFORMATION	CHAR		1	$1.	DDR PRERECOVERY THYROXINE-T4
PTIME	Patient Survival Time in days (based on composite death date)	CALCULATED				NUM		4		Patient Survival Time in days (based on composite death date)
PULM_INF_CONF_DON	DECEASED DONOR-INFECTION PULMONARY SOURCE-CONFIRMED	DDR	1994-04-01	2015-03-31	CLINICAL INFORMATION	CHAR		1	$1.	DDR PULMONARY INFECTION CONFIRMED
PULM_INF_DON	DECEASED DONOR-INFECTION PULMONARY SOURCE	DDR	1994-04-01		CLINICAL INFORMATION	NUM		8	1.	DDR PULMONARY INFECTION
PUMP_KI	KIDNEY PUMP USED	DDR/TRR-CALCULATED	1994-04-01			CHAR		1		PUMP USED
PX_NON_COMPL_PA	PANCREAS GRAFT FAILURE CONTRIBUTORY CAUSE-PATIENT NON-COMPLIANT	TRF	2004-06-30			CHAR		1		TRF GRAFT FAILURE CONTRIBUTORY CAUSE- Pancreas:PATIENT NON-COMPLIANT
PX_STAT	RECIPIENT STATUS(Died, ReTX, Lost, Alive)	TRR/TRF-CALCULATED	1987-10-01		PATIENT STATUS	CHAR	$PXSTAT	1		Pat. Status: Died, ReTX, Lost, Alive
PX_STAT_DATE	RECIPIENT STATUS DATE	TRR/TRF-CALCULATED	1987-10-01		PATIENT STATUS	NUM		8	MMDDYY10.	DATE OF DEATH, RE-TX OR LAST FOLLOW-UP
R_FIN_FLOW_RATE_TX	Right Kidney Final Flow Rate at Transplant	TRR	2015-03-31		TRANSPLANT CLINICAL INFORMATION	NUM		8	7.2	TRR Right Kidney Final Flow Rate at Transplant
R_FIN_RESIST_TX	Right Kidney Final Resistance at Transplant	TRR	2015-03-31		TRANSPLANT CLINICAL INFORMATION	NUM		8	7.2	TRR Right Kidney Final Resistance at Transplant
RA1	RECIPIENT A1 ANTIGEN	RH	1987-10-01		RECIPIENT HLA TYPING	NUM	ALOCUS	8	6.	Computed Recipient A1 Antigen
RA2	RECIPIENT A2 ANTIGEN	RH	1987-10-01		RECIPIENT HLA TYPING	NUM	ALOCUS	8	6.	Computed Recipient A2 Antigen
RB1	RECIPIENT B1 ANTIGEN	RH	1987-10-01		RECIPIENT HLA TYPING	NUM	BLOCUS	8	6.	Computed Recipient B1 Antigen
RB2	RECIPIENT B2 ANTIGEN	RH	1987-10-01		RECIPIENT HLA TYPING	NUM	BLOCUS	8	6.	Computed Recipient B2 Antigen
RDA1	DONOR RETPYED A1 ANTIGEN	RH	1987-10-01		RECIPIENT HLA TYPING	NUM	ALOCUS	8	6.	RH Recip Histo Donor A1 Antigen
RDA2	DONOR RETPYED A2 ANTIGEN	RH	1987-10-01		RECIPIENT HLA TYPING	NUM	ALOCUS	8	6.	RH Recip Histo Donor A2 Antigen
RDB1	DONOR RETPYED B1 ANTIGEN	RH	1987-10-01		RECIPIENT HLA TYPING	NUM	BLOCUS	8	6.	RH Recip Histo Donor B1 Antigen
RDB2	DONOR RETPYED B2 ANTIGEN	RH	1987-10-01		RECIPIENT HLA TYPING	NUM	BLOCUS	8	6.	RH Recip Histo Donor B2 Antigen
RDDR1	DONOR RETPYED DR1 ANTIGEN	RH	1987-10-01		RECIPIENT HLA TYPING	NUM	DRLOCUS	8	6.	RH Recip Histo Donor DR1 Antigen
RDDR2	DONOR RETPYED DR2 ANTIGEN	RH	1987-10-01		RECIPIENT HLA TYPING	NUM	DRLOCUS	8	6.	RH Recip Histo Donor DR2 Antigen
RDR1	RECIPIENT DR1 ANTIGEN	RH	1987-10-01		RECIPIENT HLA TYPING	NUM	DRLOCUS	8	6.	Computed Recipient DR1 Antigen
RDR2	RECIPIENT DR2 ANTIGEN	RH	1987-10-01		RECIPIENT HLA TYPING	NUM	DRLOCUS	8	6.	Computed Recipient DR2 Antigen
REC_ON_ICE	KIDNEY RECEIVED ON ICE	TRR	2004-06-30		ORGAN RECOVERY	NUM	RECONICE	8	6.	KIDNEY(S) RECIVED ON ICE
REC_ON_PUMP	KIDNEY RECEIVED ON PUMP	TRR	2004-06-30		ORGAN RECOVERY	NUM	RECONPMP	8	6.	KIDNEY(S) RECIVED ON PUMP
RECOV_COUNTRY	LIVING DONOR-COUNTRY OF ORGAN RECOVERY IF NOT U.S.	LDR	1999-10-25		ORGAN RECOVERY	CHAR	$CTRY	3	$3.	DON SPECIFY COUNTRY
RECOV_OUT_US	LIVING DONOR-ORGAN RECOVERED OUTSIDE U.S.	LDR	1999-10-25		ORGAN RECOVERY	CHAR		1	$1.	DON RECOVERED OUTSIDE THE U.S.
RECOVERY_DATE	DECEASED ORGAN RECOVERY DATE	DDR	1987-10-01		ORGAN RECOVERY	NUM		8	MMDDYY10.	DON RECOVERY DATE (DONOR TO OR)
REFERRAL_DATE	DECEASED DONOR-REFERRAL DATE	DDR	1994-04-01		PROVIDER INFORMATION	NUM		8	MMDDYY10.	DON REFERRAL DATE
REGION	UNOS REGION WHERE TRANSPLANTED	CALCULATED				NUM		8	11.	Region
REJ_ACUTE_PA	RECIPIENT GRAFT FAILURE CONTRIBUTORY CAUSE:ACUTE REJECTION-PA	TRR	1994-04-01		POST TRANSPLANT CLINICAL INFORMATION	CHAR		1		GRAFT FAILURE CONTRIBUTORY CAUSE- Pancreas:ACUTE REJECTION: pre 1/1/2007
REJ_BIOPSY	TRR-KIDNEY REJECTION BIOPSY DONE	TRR-KI	1987-10-01	2004-06-30	POST TRANSPLANT CLINICAL INFORMATION	CHAR		1		TRR-KI REJECTION BIOPSY DONE
REJ_CHRONIC_PA	RECIPIENT GRAFT FAILURE CONTRIBUTORY CAUSE:CHRONIC REJECTION-PA	TRF	1987-10-01		CLINICAL INFORMATION	CHAR		1		GRAFT FAILURE CONTRIBUTORY CAUSE - Pancreas:CHRONIC REJECTION
REJ_HYPER_PA	RECIPIENT GRAFT FAILURE CONTRIBUTORY CAUSE:HYPERACUTE REJECTION-PA	TRR	1994-04-01		POST TRANSPLANT CLINICAL INFORMATION	CHAR		1		GRAFT FAILURE CONTRIBUTORY CAUSE- Pancreas:HYPERACUTE REJECTION
REJCNF_KI	TRR KIDNEY REJECTION CONFIRMED BY BIOPSY	TRR	1987-10-01	2004-06-30	POST TRANSPLANT CLINICAL INFORMATION	CHAR		1		TRR REJECTION CONFIRMED BY BIOPSY
REJCNF_PA	TRR PANCREAS REJECTION CONFIRMED BY BIOPSY	TRR	1987-10-01	2004-06-30	POST TRANSPLANT CLINICAL INFORMATION	CHAR		1		TRR REJECTION CONFIRMED BY BIOPSY
REJTRT_KI	TRR RECIPIENT TREATED FOR KIDNEY REJECTION	TRR	1987-10-01	2004-06-30	POST TRANSPLANT CLINICAL INFORMATION	CHAR		1		TRR PATIENT TREATED FOR REJECTION
REJTRT_PA	TRR RECIPIENT TREATED FOR PANCREAS REJECTION	TRR	1987-10-01	2004-06-30	POST TRANSPLANT CLINICAL INFORMATION	CHAR		1		TRR PATIENT TREATED FOR REJECTION
REM_CD	REASON FOR REMOVAL FROM THE WAITING LIST	WAITING LIST DATA	1987-10-01		WAITING LIST DATA	NUM	REMCD	8	6.	WL REASON FOR REMOVAL FROM THE WAITING LIST	THIS IS MISSING IF PATIENT IS STILL WAITING AT TIME DATASET CREATED
RESUM_MAINT_DIAL	RECIPIENT RESUMED MAINTENANCE DIALYSIS POST KI TX	TRR/TRF	1987-10-01		POST TRANSPLANT CLINICAL INFORMATION/CLINICAL INFORMATION	CHAR		1	$1.	KI resumed Maintenance Dialysis
RESUM_MAINT_DIAL_DT	RECIPIENT DATE RESUMED MAINTENANCE DIALYSIS POST KI TX	TRR/TRF	1987-10-01		POST TRANSPLANT CLINICAL INFORMATION/CLINICAL INFORMATION	NUM		8	MMDDYY8.	KI resumed Maintenance Dialysis date
RESUSCIT_DUR	DECEASED DONOR-RESUSCITATION FOLLOWING CARDIAC ARREST POST BRAIN DEATH	DDR	1999-10-25		CLINICAL INFORMATION	NUM		8	10.2	DON DURATION OF RESUSCITATION
RETXDATE_KI	DATE KIDNEY RE-TRANSPLANTED	CALCULATED				NUM		8	MMDDYY8.	DATE OF RE-TRANSPLANT
RETXDATE_PA	DATE PANCREAS RE-TRANSPLANTED	CALCULATED				NUM		8	MMDDYY10.	DATE OF RE-TRANSPLANT
RT_KI_BIOPSY	DECEASED DONOR-RIGHT KIDNEY BIOPSY AT RECOVERY	DDR	1999-10-25		ORGAN RECOVERY	CHAR		1	$1.	DON KIDNEY BIOPSY (RIGHT)
RT_KI_GLOMERUL	DECEASED DONOR-RIGHT KIDNEY %GLOMERULOSCLEROSIS AT RECOVERY	DDR	1999-10-25		ORGAN RECOVERY	NUM	KIGLUMER	8	6.	DON % GLOMERULOSCLEROSIS (RIGHT KIDNEY)
SELF_DON	LIVING DONOR-SELF AS SECONDARY PAYMENT TYPE	LDR	1999-10-25	2007-01-01	DONOR INFORMATION	CHAR		1	$1.	LDR SELF SECONDARY SOURCE OF PAYMENT
SERUM_CREAT	RECIPIENT CREATININE AT DISCHARGE	TRR	1994-04-01		POST TRANSPLANT CLINICAL INFORMATION	NUM		8	10.2	TRR Dischr Most Recent Serum Creatinine
SGOT_DON	DECEASED DONOR-TERMINAL SGOT/AST	DDR	1994-04-01		CLINICAL INFORMATION	NUM		8	10.2	DDR TERMINAL LAB SGOT/AST
SGPT_DON	DECEASED DONOR-TERMINAL SGPT/ALT	DDR	1994-04-01		CLINICAL INFORMATION	NUM		8	10.2	DDR TERMINAL LAB SGPT/ALT
SHARE_TY	ALLOCATION TYPE-LOCAL/REGIONAL/NATIONAL (3 = Local, 4 = Regional, 5 = National, 6 = Foreign)	CALCULATED				NUM	SHARETY	8		Share Type	3 = Local, 4 = Regional, 5 = National, 6 = Foreign
SKIN_CANCER_DON	DECEASED DONOR-SKIN CANCER AT PROCUREMENT (Y/N)	DDR	1994-04-01		DONOR HISTORY	CHAR		1	$1.	DDR SKIN CANCER AT PROCUREMENT (Y/N)
SSDMF_DEATH_DATE	SOCIAL SECURITY DEATH MASTER FILE DEATH DATE					NUM		8	MMDDYY10.	SSDMF DEATH DATE
STATUS_DDR	DDR Form Status	DDR				CHAR	$FRMSTAT	1	$1	DDR Form Status
STATUS_LDR	LDR Form Status	LDR				CHAR	$FRMSTAT	1	$1	LDR Form Status
STATUS_TCR	TCR Form Status	TCR				CHAR	$FRMSTAT	1	$1	TCR Form Status
STATUS_TRR	TRR Form Status	TRR				CHAR	$FRMSTAT	1	$1	TRR Form Status
SURG_INCIS	RECIPIENT SURGICAL INCISION LOCATION-PA	TRR	1999-10-25	2007-01-01	TRANSPLANT CLINICAL INFORMATION	NUM	SURGINCI	8	6.	TRR SURGICAL INCISION
TATTOOS	DECEASED DONOR-TATOOS	DDR	1999-10-25		DONOR HISTORY	CHAR		1	$1.	DON TATTOOS
TBILI_DON	DECEASED DONOR-TERMINAL TOTAL BILIRUBIN	DDR	1994-04-01		CLINICAL INFORMATION	NUM		8	10.2	DDR TERMINAL LAB BILIRUBIN
TOT_SERUM_ALBUM	RECIPIENT TOTAL SERUM ALBUMIN @ REGISTRATION	TCR	1999-10-25		CLINICAL INFORMATION	NUM		8	10.2	TCR TOTAL SERUM ALBUMIN AT LISTING
TRR_ID_CODE	ENCRYPTED TRANSPLANT IDENTIFIER	CALCULATED				CHAR		15		ENCRYPTED TRR_ID
TRTREJ1Y_KI	TREATED FOR REJECTION WITHIN 1 YEAR	CALCULATED				CHAR		1		CALCULATED-TREATED FOR REJECTION WITHIN 1 YEAR
TRTREJ1Y_PA	TREATED FOR REJECTION WITHIN 1 YEAR	CALCULATED				CHAR		1		CALCULATED-TREATED FOR REJECTION WITHIN 1 YEAR
TRTREJ6M_KI	TREATED FOR REJECTION WITHIN 6 MONTHS	CALCULATED				CHAR		1		CALCULATED-TREATED FOR REJECTION WITHIN 6 MONTHS
TRTREJ6M_PA	TREATED FOR REJECTION WITHIN 6 MONTHS	CALCULATED				CHAR		1		CALCULATED-TREATED FOR REJECTION WITHIN 6 MONTHS
TX_DATE	TRANSPLANT DATE	TRR	1987-10-01		RECIPIENT INFORMATION	NUM		8	MMDDYY10.	TRR TRANSPLANT DATE
TX_PROCEDUR_TY_KI	KIDNEY TRANSPLANT PROCEDURE TYPE	TRR	1987-10-01		TRANSPLANT CLINICAL INFORMATION	NUM	KPPROC	8		TRR PROCEDURE TYPE
TX_PROCEDUR_TY_PA	PANCREAS TRANSPLANT PROCEDURE TYPE	TRR	1987-10-01		TRANSPLANT CLINICAL INFORMATION	NUM	KPPROC	8		TRR PROCEDURE TYPE
TX_TYPE	TYPE OF PANCREAS TRANSPLANT	CALCULATED				CHAR	$TXTYPE.	3		SKP or PTA or PWK or PAK
TXHRT	SIMULTANEOUS HEART	CALCULATED				CHAR		1		SIMULTANEOUS HEART - Y
TXINT	SIMULTANEOUS INTESTINE	CALCULATED				CHAR		1		SIMULTANEOUS INTESTINE - W, S	W-Whole, S-Segment (This field to determines the type of multi-organ transplant performed)
TXKID	SIMULTANEOUS KIDNEY	CALCULATED				CHAR		1		SIMULTANEOUS KIDNEY - R, L, E	R-Right, L-Left, E-En-Bloc (This is organ placement data from OPO, use TX_PROCEDUR_TY to identify transplant procedure types)
TXLIV	SIMULTANEOUS LIVER	CALCULATED				CHAR		1		SIMULTANEOUS LIVER - W, S	W-Whole, S-Segment/Split (This field to determines the type of multi-organ transplant performed)
TXLNG	SIMULTANEOUS LUNG	CALCULATED				CHAR		1		SIMULTANEOUS LUNG - R, L, D	R-Right, L-Left, D-Double (This field to determines the type of multi-organ transplant performed)
TXPAN	SIMULTANEOUS PANCREAS	CALCULATED				CHAR		1		SIMULTANEOUS PANCREAS - W, S	W-Whole, S-Segment (This field to determines the type of multi-organ transplant performed)
TXVCA	SIMULTANEOUS VCA	CALCULATED				CHAR	$SIMULTX	1		SIMULTANEOUS VCA - Y
URINE_INF_CONF_DON	DECEASED DONOR-INFECTION URINE SOURCE-CONFIRMED	DDR	1994-04-01	2015-03-31	CLINICAL INFORMATION	CHAR		1	$1.	DDR INFECTION URINE SOURCE-CONFIRMED
URINE_INF_DON	DECEASED DONOR-INFECTION URINE SOURCE	DDR	1994-04-01		CLINICAL INFORMATION	NUM		8	1.	DDR INFECTION URINE SOURCE
USE_WHICH_PRA	USE PEAK OR CURRENT PRA FOR ALLOCATION SCORING	WAITING LIST DATA			WAITING LIST DATA	CHAR		1	$1.	WL USE PEAK OR CURRENT PRA FOR ALLOCATION SCORING	PRA was used in allocation prior to 10/1/2009
VAL_DT_DDR	DDR Validation Date	DDR				NUM		8	DATETIME22.3	DDR Validation Date
VAL_DT_LDR	LDR Validation Date	LDR				NUM		8	DATETIME19.	LDR Validation Date
VAL_DT_TCR	TCR Validation Date	TCR				NUM		8	DATETIME22.3	TCR Validation Date
VAL_DT_TRR	TRR Validation Date	TRR				NUM		8	DATETIME22.3	TRR Validation Date
VASC_MGMT	RECIPIENT VENOUS MANAGEMENT TYPE @ PANCREAS TX	TRR	1987-10-01		TRANSPLANT CLINICAL INFORMATION	NUM	PAVENVAS	8	6.	Venous Vascular Management
VASODIL_DON	DECEASED DONOR-VASODILATORS W/IN 24HRS PRE-CROSS CLAMP	DDR	1994-04-01		CLINICAL INFORMATION	CHAR		1	$1.	DDR VASODILATORS PRE CROSS CLAMP
VDRL_DON	DECEASED DONOR-RPR-VDRL RESULT	DDR	1987-10-01		CLINICAL INFORMATION	CHAR	$SERSTAT	2	$2.	DDR RPR-VDRL SEROLOGY
VEN_EXT_GRF	PANCREAS VENOUS EXTENSION GRAFT	TRR	1990-10-01		TRANSPLANT CLINICAL INFORMATION	CHAR		1	$1.	VENOUS EXTENSION GRAFT
WARM_ISCH_TM_DON	DECEASED DONOR NON-HEART BEATING ESTIMATED WARM ISCHEMIC TIME (MINUTES)	DDR	1994-04-01	2015-03-31	ORGAN RECOVERY	NUM		8	6.	DDR WARM ISCHEMIC TIME (MINUTES)
WGT_KG_CALC	CALCULATED RECIPIENT WEIGHT (kg)	CALCULATED				NUM		8	8.1	Calculated Recipient Weight (kg)
WGT_KG_DON_CALC	CALCULATED DONOR WEIGHT (KG)	CALCULATED				NUM		8	8.1	Calculated Donor Weight
WGT_KG_TCR	RECIPIENT WEIGHT (kg) @ REGISTRATION	TCR	1987-10-01		CLINICAL INFORMATION	NUM		8	9.4	TCR WEIGHT IN KG://WEIGHT
WL_ID_CODE	ENCRYPTED REGISTRATION IDENTIFIER	CALCULATED				NUM		8	13.1	ENCRYPTED WL_ID
WL_ORG	ORGAN LISTED FOR	WAITING LIST DATA	1987-10-01			CHAR		4	$4.	ORGAN LISTED FOR
WLHL	WAS CANDIDATE LISTED FOR SIMULTANEOUS HEART-LUNG?	CALCULATED				CHAR		1	$1.	MULTIPLE LISTING W/HEART-LUNG
WLHR	WAS CANDIDATE LISTED FOR SIMULTANEOUS HEART?	CALCULATED				CHAR		1	$1.	MULTIPLE LISTING W/HEART
WLIN	WAS CANDIDATE LISTED FOR SIMULTANEOUS INTESTINE?	CALCULATED				CHAR		1	$1.	MULTIPLE LISTING W/INTESTINE
WLKI	WAS CANDIDATE LISTED FOR SIMULTANEOUS KIDNEY?	CALCULATED				CHAR		1	$1.	MULTIPLE LISTING W/KIDNEY
WLKP	WAS CANDIDATE LISTED FOR SIMULTANEOUS KIDNEY-PANCREAS?	CALCULATED				CHAR		1	$1.	MULTIPLE LISTING W/KIDNEY-PANCREAS
WLLI	WAS CANDIDATE LISTED FOR SIMULTANEOUS LIVER?	CALCULATED				CHAR		1	$1.	MULTIPLE LISTING W/LIVER
WLLU	WAS CANDIDATE LISTED FOR SIMULTANEOUS LUNG?	CALCULATED				CHAR		1	$1.	MULTIPLE LISTING W/LUNG
WLPA	WAS CANDIDATE LISTED FOR SIMULTANEOUS PANCREAS?	CALCULATED				CHAR		1	$1.	MULTIPLE LISTING W/PANCREAS
WLPI	WAS CANDIDATE LISTED FOR SIMULTANEOUS PANCREAS ISLET?	CALCULATED				CHAR		1	$1.	MULTIPLE LISTING W/PANCREAS ISLET
WLVC	WAS CANDIDATE LISTED FOR SIMULTANEOUS VCA?	CALCULATED				CHAR		1	$1.	MULTIPLE LISTING W/ VCA
WORK_INCOME_TCR	WORK FOR INCOME AT REGISTRATION?	TCR	2004-06-30		CANDIDATE INFORMATION	CHAR		1	$1.	TCR WORKING FOR INCOME
WORK_INCOME_TRR	RECIPIENT WORK FOR INCOME AT TRANSPLANT?	TRR	2004-06-30		PATIENT STATUS	CHAR		1	$1.	TRR WORKING FOR INCOME
WT_QUAL_DATE	WL OPTN (NON-VARIANCE) WAITING TIME QUALIFYING DATE	WAITING LIST DATA	1987-10-01		WAITING LIST DATA	NUM		8	MMDDYY10.	WL OPTN (non-variance) Waiting Time Qualifying Date
YR_ENTRY_US_TCR	YEAR OF ENTRY TO THE U.S.	TCR	2004-06-30		CANDIDATE INFORMATION	NUM		8	DATETIME22.3	TCR YEAR OF ENTRY TO THE U.S.
